RESEARCH ARTICLE

# Whole Transcriptome Analysis Provides Insights into Molecular Mechanisms for Molting in *Litopenaeus vannamei*

Yi Gao<sup>1</sup>, Xiaojun Zhang<sup>1</sup>, Jiankai Wei<sup>1,2</sup>, Xiaoqing Sun<sup>1,2</sup>, Jianbo Yuan<sup>1</sup>, Fuhua Li<sup>1</sup>, Jianhai Xiang<sup>1\*</sup>

**1** Key Laboratory of Experimental Marine Biology, Institute of Oceanology, Chinese Academy of Sciences, Qingdao, China, **2** University of Chinese Academy of Sciences, Beijing, China

\* [jhxiang@qdio.ac.cn](mailto:jhxiang@qdio.ac.cn)

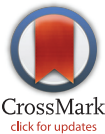

**OPEN ACCESS**

**Citation:** Gao Y, Zhang X, Wei J, Sun X, Yuan J, Li F, et al. (2015) Whole Transcriptome Analysis Provides Insights into Molecular Mechanisms for Molting in *Litopenaeus vannamei*. PLoS ONE 10(12): e0144350. doi:10.1371/journal.pone.0144350

**Editor:** Sebastian D. Fugmann, Chang Gung University, TAIWAN

**Received:** September 25, 2015

**Accepted:** November 17, 2015

**Published:** December 9, 2015

**Copyright:** © 2015 Gao et al. This is an open access article distributed under the terms of the [Creative Commons Attribution License](https://creativecommons.org/licenses/by/4.0/), which permits unrestricted use, distribution, and reproduction in any medium, provided the original author and source are credited.

**Data Availability Statement:** Data from this article have been deposited with NCBI SRA database (<http://trace.ncbi.nlm.nih.gov/Traces/sra/sra.cgi?view=studies>). The accession numbers of eight SRA samples are SRX1098368, SRX1098369, SRX1098370, SRX1098371, SRX1098372, SRX1098373, SRX1098374 and SRX1098375.

**Funding:** This work was financially supported by the Major State Basic Research Development Program of China (973 program) (2012CB114403) and National Natural Science Foundation of China (31172396, 41376165).

## Abstract

Molting is one of the most important biological processes in shrimp growth and development. All shrimp undergo cyclic molting periodically to shed and replace their exoskeletons. This process is essential for growth, metamorphosis, and reproduction in shrimp. However, the molecular mechanisms underlying shrimp molting remain poorly understood. In this study, we investigated global expression changes in the transcriptomes of the Pacific white shrimp, *Litopenaeus vannamei*, the most commonly cultured shrimp species worldwide. The transcriptome of whole *L. vannamei* was investigated by RNA-sequencing (RNA-seq) throughout the molting cycle, including the inter-molt (C), pre-molt (D0, D1, D2, D3, D4), and post-molt (P1 and P2) stages, and 93,756 unigenes were identified. Among these genes, we identified 5,117 genes differentially expressed ( $\log_2\text{ratio} \geq 1$  and  $\text{FDR} \leq 0.001$ ) in adjacent molt stages. The results were compared against the National Center for Biotechnology Information (NCBI) non-redundant protein/nucleotide sequence database, Swiss-Prot, PFAM database, the Gene Ontology database, and the Kyoto Encyclopedia of Genes and Genomes database in order to annotate gene descriptions, associate them with gene ontology terms, and assign them to pathways. The expression patterns for genes involved in several molecular events critical for molting, such as hormone regulation, triggering events, implementation phases, skelemin, immune responses were characterized and considered as mechanisms underlying molting in *L. vannamei*. Comparisons with transcriptomic analyses in other arthropods were also performed. The characterization of major transcriptional changes in genes involved in the molting cycle provides candidates for future investigation of the molecular mechanisms. The data generated in this study will serve as an important transcriptomic resource for the shrimp research community to facilitate gene and genome annotation and to characterize key molecular processes underlying shrimp development.

**Competing Interests:** The authors have declared that no competing interests exist.

## Introduction

The exoskeleton of Crustacean is essential for body shape maintenance, defense response, and locomotion via attached somatic muscles. Nevertheless, this structure can confine body growth and restrict mating. Thus, Crustacean periodically shed and replace their old exoskeletons, a process referred to as molting [1]. Shrimp is an important kind of Crustacean, and molting is a crucial process for shrimp. Molting, or ecdysis, allows the shrimp body to expand rapidly by absorbing water after every molt, but produces little or no increase in body size (volume) until the next ecdysis. Thus, shrimp grows in a ladder-type manner [2]. In theory, more frequent molting would result in larger body size. In addition, molting is a vital step in metamorphosis. During the early stages of their life cycle, penaeid shrimp undergo metamorphosis in four larval stages: nauplii, zoea, mysis, and post-larvae. Molting occurs twelve times more frequently during these larval stages than in later stages of the shrimp life cycle [3]. Reproductive molting is also necessary for shrimp to mate and spawn. On an average, penaeid shrimp, such as *Litopenaeus vannamei*, experience about 50 molts during a lifetime [4]. Molting not only shapes shrimp morphology, physiology, and behavior, but also plays roles in deformities, death, and predation. Moreover, molting can slough off attachments and parasites, and also affect limb regeneration [5]. Therefore, it is very important to understand the mechanisms underlying shrimp molting.

Molting activity persists throughout the life of a shrimp, and has clear physiological effects. The molting cycle can be divided into four recurrent stages, including inter-molt, pre-molt, ecdysis, and post-molt, according to the appearance of epidermis, pigmentation, formation of new setae, and the presence of matrix or internal cones in the setal lumen, respectively [5,6]. During the inter-molt period (C), the muscle regenerates and energy is stored as glycogen and lipids [7]. The pre-molt phase (D), generally subdivided into D0, D1, D2, D3, and D4, is the longest period and comprises up to two-thirds of the molting cycle. Shrimp lose the connection between living tissue and extracellular cuticles at early pre-molt. Subsequently, somatic muscle atrophy, resorption of the old exoskeleton, and formation of a new exoskeleton under molting fluid then occur in preparation for ecdysis [8,9]. Ecdysis takes only a few minutes and individual is able to escape from the confines of the cuticle and take up water so the body expands quickly. After ecdysis (ecdysis-P1 and P1-P2), there is a rapid increase in body size, followed by a period with little or no body size increase until the next molt [10]. The newly formed exoskeleton expands through mineral and protein deposition and quickly becomes hard for defense and locomotion during post-molt.

Molting is a complex process under the control of many regulatory factors, including neuropeptide hormones, ecdysteroids [11–13], and the external environment [14–16]. Previous studies on shrimp molting were mainly based on eyestalk ablation, hormone isolation, and cloning, while the expression analyses of genes associated with exoskeleton hardening involved quantitative reverse transcription polymerase chain reaction (RT-PCR) and microarrays [17–20]. For instance, three cDNA fragments from genes associated with synthesis of molting-inhibiting hormone (MIH) were isolated from eyestalk in three crustaceans: *Eriocheir sinensis*, *Trachypenaeus curvirostris*, and *Fenneropenaeus chinensis* [21–23]. Two retinoid X receptor (RXR) genes, an ecdysone receptor gene (*ECR*), and an ecdysone inducible gene (*E75*), were identified in *F. chinensis* [17,18]. Distinctive MIH-like peptides, which have been implicated in repression of ecdysteroid synthesis, were identified in Kuruma shrimp *Marsupenaeus japonicus* [24,25]. Recently, studies investigating expression patterns of *LvEcr*, *LvRXR*, and *LvE75* in different tissues and developmental stages in *L. vannamei* have found that molting signaling in different tissues exhibits different expression patterns, which appear to be reflective of their distinct functions in molting, chitin metabolism, and muscle growth [26]. Despite these previous

findings, our understanding of the molecular mechanisms underlying shrimp molting remains very limited.

In order to connect the mechanisms and molecular events associated with shrimp molting, we used RNA-Sequencing (RNA-seq) to investigate expression changes across all genes during the molting process of *L. vannamei*, one of the most commonly cultured shrimp species, representing nearly 40% of penaeid shrimp production worldwide [27]. This approach is considered to have high power to dissect gene networks associated with particular biological and developmental processes at a whole transcriptome level [28–30]. Here, we report a comprehensive analysis of global transcript expression changes associated with shrimp molting, which not only enhances our understanding of the molecular mechanisms underlying shrimp molting, but also provides a valuable resource of transcriptome data shrimp genome annotation and further identification of candidate genes controlling molting in shrimp and other molting animals.

## Materials and Methods

### Sample collection and RNA isolation

Healthy adult Pacific white shrimp (*L. vannamei*) with an average body length of 14–16 cm were collected from laboratory culture ponds. All shrimp were the same generation and had been cultured over six months to minimize generational and environmental effects. All procedures involving animals throughout the experiments were conducted in strict accordance with the Chinese Legislation on the Use and Care of Laboratory Animals. And all animal experiments were performed as per the institutional ethic committee guidelines of Institute of Oceanology Chinese Academy of Sciences (IOCAS).

Animals were sorted by molt stage according to the appearance of epidermis, pigmentation, formation of new setae, and presence of matrix or internal cones in the setal lumen (Fig 1). Molting stages were classified as inter-molt (C), pre-molt (D0, D1, D2, D3, and D4), and post-molt (P1 and P2). A loop design comparing consecutive molt stages (C-D0-D1-D2-D3-D4-P1-P2-C) was employed for the analysis to achieve consecutive times for all periods without interruption. Each whole shrimp was considered a separate sample and two samples were taken as biological replicates for each molt stage. All samples were immediately frozen in liquid nitrogen and stored at -80°C until RNA isolation.

Each sample was crushed in a mortar with liquid nitrogen, and total RNA was prepared using a Trans-up RNA isolation kit (Biostar, Shanghai, China) according to the manufacturer's protocol. The yield and purity of each RNA sample were determined using a NanoDrop™ 2000 spectrophotometer (Thermo Scientific, USA), and the integrity of all RNA samples was assessed by gel electrophoresis with 1% agarose. Total RNA was treated with DNase to remove DNA contamination.

### RNA sequencing library construction and Illumina sequencing

Isolation and enrichment of mRNA from total RNA was performed using oligo (dT) magnetic beads (Illumina, CA, USA). Then, mRNA was fragmented to short fragments to be used as templates for random hexamer-primed synthesis of first strand cDNA by fragmentation buffer. Second-strand cDNA was synthesized using buffer, dNTPs, RNase H, and DNA polymerase I. A paired-end cDNA library was synthesized using the Genomic Sample Preparation Kit (Illumina, CA, USA) according to the manufacturer's instructions. Short fragments were purified with QIA-Quick® PCR extraction kit (QIAGEN, Germany) and eluted in 10 µL of EB buffer (QIAGEN, Germany). These short fragments were connected via sequencing adapters (Illumina, CA, USA). Agarose gel electrophoresis was used to select fragments approximately 50 bp in size. Finally, cDNA libraries were sequenced on an Illumina HiSeq™ 2500 (Novogene, Beijing).

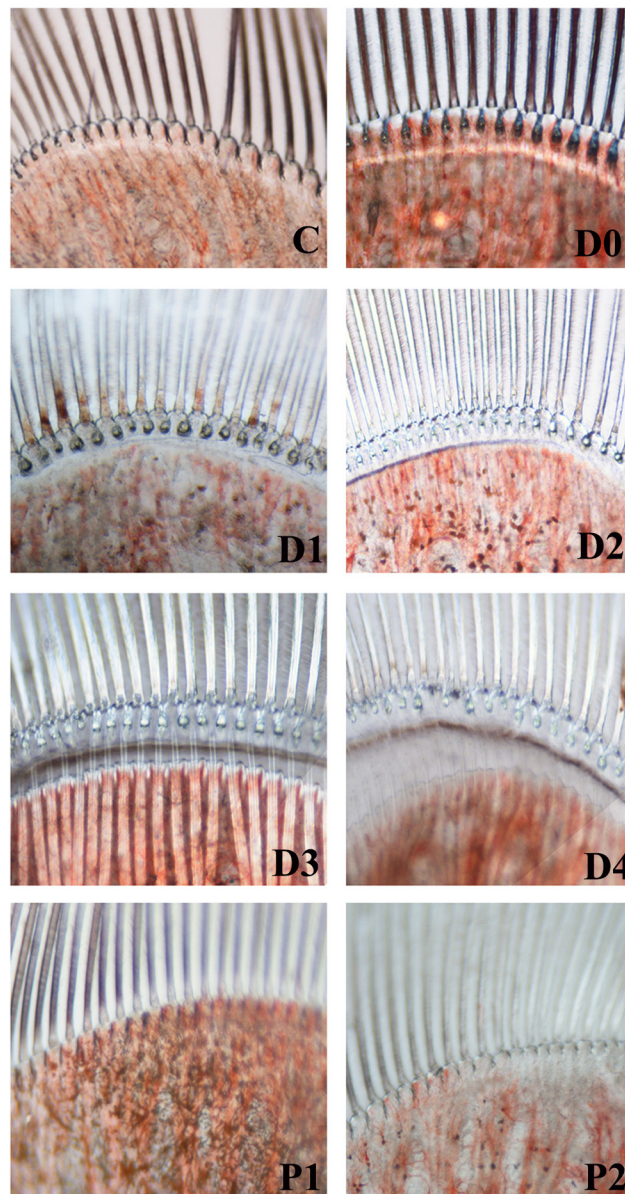

**Fig 1. Morphological changes of shrimp uropods during molting stages under a light microscope (400 x magnification).** Observed physical characteristics of each stage were as follows: 1) Inter-molt stage (C stage): mature setal cones and fully-spread epidermis. 2) Pre-molt stage (D stage): D0, a clear margin of epidermal tissue at the base of the setal cones. D1, a clear, narrow zone between the setal cones and the epidermis. D2, a wider clear zone and a wavy edge of epidermis. D3, a wider clear zone, highly wavy edge of epidermis, and a thin, white layer at the edge of the epidermis. D4, a noticeably wider clear zone, serrated edges of epidermis, a light-reflecting white layer at the edge of the epidermis, and parallel-band edepidermis. 3) Post-molt stage (P stage): P1, soft and delicate setae, absence of setal cones. P2, presence of young setal cones.

doi:10.1371/journal.pone.0144350.g001

### Assembly of sequencing data and gene annotation

Raw sequence data were transformed by base calling into sequence data and stored in fastq format. Raw reads were cleaned by removing adapter sequences, empty reads, and low quality

sequences. Cleaned reads were assembled with the software package RSEM [31] using *L. vannamei* reference transcriptome data obtained from the molting-transcriptome sequencing (SRX1411196) and combined with the data previously sequenced by our laboratory (SRR1460493, SRR1460494, SRR1460495, SRR1460504 and SRR1460505).

For annotation analysis, unigenes were BLASTX-searched against five databases, including the National Center for Biotechnology Information (NCBI) non-redundant protein sequence (NR) database, the NCBI non-redundant nucleotide sequence (NT) database, KEGG Orthology (KO) database, Swissprot, and the PFAM database, using a cut-off E-value of  $10^{-5}$ . Unigenes were annotated based on BLASTX results, and the best alignments were used for downstream analyses.

### Normalized expression levels of genes from RNA-seq

To eliminate the influence of different gene lengths and sequence discrepancies on expression calculations, gene expression levels based on read counts obtained by RSEM were normalized using the FPKM (Fragments Per Kilo bases per Million fragments) transformation [32]. Thus, calculated gene expression levels could be used for direct comparison among samples. Expression values were standardized across the dataset to enable the data from different genes to be combined.

### Screening of differential expression genes (DEGs)

Using the R package DESeq, differentially expression genes (DEGs) were identified with a random sampling model based on the read count for each gene at different developmental stages [33]. False discovery rate (FDR)  $\leq 0.001$  and absolute value of  $\log_2$ ratio  $\geq 1$  were set as the threshold for significance of gene expression differences between adjacent samples (C-D0, D0-D1, D1-D2, D2-D3, D3-D4, D4-P1, P1-P2, and P2-C).

### Gene Ontology and KEGG analysis

Gene Ontology (GO) terms were used to describe biological processes, molecular functions, and cellular components. As an international standardized gene functional classification system, GO offers both a dynamically updated controlled vocabulary and strictly defined concepts to describe the properties of genes and their products comprehensively. The Blast2GO(version 3.0) (<https://www.blast2go.com/>) program was used to obtain GO annotations for all genes with a Fisher's Exact Test (filtered with FDR  $\leq 0.01$ ) [34]. The unigene sequences were aligned to the Clusters of Orthologous Group (COG) database. Using GO functional classification analysis (WEGO), we categorized all genes based on function [35]. The Kyoto Encyclopedia of Genes and Genomes (KEGG) database was used to assign and predict putative functions and pathways associated with the assembled sequences [36]. A heat map which grouped genes according to FPKM values was generated in Cluster 3.0 [37] and visualized in TreeView 1.6 to analyze expression levels across molting periods [38].

### Real time qPCR amplification

To validate RNA-seq data and expression profiles, six genes were randomly selected for validation using real-time quantitative polymerase chain reaction (RT-qPCR). Actin T2 (c82047\_g1) was used as an internal standard, and relative gene expression levels were calculated using the comparative Ct method with the formula  $2^{-\Delta\Delta Ct}$  [39]. All samples were run in triplicate in separate tubes; each cDNA sample was run in duplicate. All data were expressed as mean +SD after normalization. Real-time qPCR results were then compared with transcriptome data to detect

the expression correlation of each gene. The primers used for amplification and the annotations of the products are listed in [S1 Table](#).

### Data Availability

The sequence data in this study have been deposited into the NCBI Sequence Read Archive (<http://trace.ncbi.nlm.nih.gov/Traces/sra/sra.cgi?view=studies>), and the accession numbers of the eight SRA samples are as follows: SRX1098368, SRX1098369, SRX1098370, SRX1098371, SRX1098372, SRX1098373, SRX1098374, and SRX1098375.

## Results

### Result of RNA-Sequencing and analysis

Sixteen normalized cDNA libraries prepared from all molting stages were sequenced using the Illumina HiSeq 2500 platform. After removal of adaptor sequences, duplicate sequences, ambiguous reads, and low-quality reads, a total of 148.25 millions of clean reads (7.41Gb) with 98.7% Q20 bases were selected as high-quality reads for expression analysis. An overview of the sequencing results is summarized in [Table 1](#). Among the total number of reads from sixteen samples, 83.11% to 88.38% were matched in comparison with the reference genome. The percentages of mapped reads were similar in these libraries.

By comparing with the reference transcriptome data, all clean reads were assembled into 93,756 unigenes. To understand potential genetic mechanisms undergirding *L. vannamei* molting, 93,756 assembled unigenes were BLASTX-searched against five databases. Of the 93,756 unigenes, 15,582 match to known proteins in the NR database, and 3,689 match to putative homologues in the NT database. The KO database provided annotation for 6,493 unigenes, the Swissprot database confirmed matches for 12,873 unigenes, and 20,784 unigenes found putative homologues in the PFAM database.

### Expression analysis and evaluation of gene expression

Expression levels for each unigene during the eight stages of molting are shown in [S2 Table](#). The number of expressed unigenes (FPKM $\geq$ 0.3) in each stage were 55,639 (C), 56,655 (D0), 60,115

**Table 1. An overview of sequencing and assembly of the shrimp transcriptome from *L. vannamei*.**

| Sample | Raw Reads | Clean reads | Total mapped    | Clean bases | Error(%) | Q20(%) | GC(%) |
|--------|-----------|-------------|-----------------|-------------|----------|--------|-------|
| lvC_1  | 8462163   | 8378139     | 7205223(86.00%) | 0.42G       | 0.01     | 98.64  | 50.04 |
| lvC_2  | 8356671   | 8281105     | 7228674(87.29%) | 0.41G       | 0.01     | 98.68  | 50.01 |
| lvD0_1 | 9729632   | 9658189     | 8372908(86.69%) | 0.48G       | 0.01     | 98.63  | 50.14 |
| lvD0_2 | 9001963   | 8949633     | 7698406(86.02%) | 0.45G       | 0.01     | 98.74  | 49.85 |
| lvD1_1 | 7069133   | 7010089     | 5949698(84.87%) | 0.35G       | 0.01     | 98.52  | 46.72 |
| lvD1_2 | 8289817   | 8237292     | 9226254(86.42%) | 0.41G       | 0.01     | 98.58  | 46.87 |
| lvD2_1 | 10758027  | 10676498    | 9226254(86.42%) | 0.53G       | 0.01     | 98.66  | 49.69 |
| lvD2_2 | 9878904   | 9801263     | 8596987(87.71%) | 0.49G       | 0.01     | 98.74  | 48.46 |
| lvD3_1 | 8732484   | 8665896     | 7228584(83.41%) | 0.43G       | 0.01     | 98.65  | 51.18 |
| lvD3_2 | 8414766   | 8350596     | 6939910(83.11%) | 0.42G       | 0.01     | 98.68  | 50.47 |
| lvD4_1 | 10154005  | 10078307    | 8667790(86.00%) | 0.5G        | 0.01     | 98.79  | 50.70 |
| lvD4_2 | 9650580   | 9598685     | 8199145(85.42%) | 0.48G       | 0.01     | 98.81  | 50.08 |
| lvP1_1 | 10570861  | 10500814    | 9255363(88.14%) | 0.53G       | 0.01     | 98.71  | 50.09 |
| lvP1_2 | 10017393  | 9937550     | 8650085(87.04%) | 0.5G        | 0.01     | 98.69  | 50.77 |
| lvP2_1 | 10205898  | 10135988    | 8787490(86.70%) | 0.51G       | 0.01     | 98.78  | 49.61 |
| lvP2_2 | 10073944  | 9993119     | 8832160(88.38%) | 0.5G        | 0.01     | 98.70  | 49.97 |

doi:10.1371/journal.pone.0144350.t001

(D1), 59,636 (D2), 50,693 (D3), 57,689 (D4), 52,813 (P1), and 58,890 (P2), respectively. Among the unigenes expressed in these eight stages, 3,995 (C), 4,096 (D0), 5,994 (D1), 6,664 (D2), 4,187 (D3), 5,254 (D4), 4,360 (P1), and 5,888 (P2), respectively, were found to be expressed stage-specifically. In contrast, a large number (28,508) of unigenes were found to be expressed at all eight stages. Some genes exhibited low variance or low expression levels, and were thought either to be housekeeping genes or expressed infrequently during the molting cycle.

### Analysis of differentially expressed genes (DEGs) among molting stages

Our analysis targeted genes expressed at relatively high levels between adjacent molting stages. Using  $\log_2\text{ratio} \geq 1$  and  $\text{FDR} \leq 0.001$  as a threshold, a total of 5,117 differentially expressed genes (DEGs) between any two adjacent molting stages (i.e., C-D0, D0-D1, D1-D2, D2-D3, D3-D4, D4-P1, P1-P2, and P2-C) were identified (S3 Table). The numbers of up-regulated and down-regulated DEGs are shown in Fig 2. A total of 4,015 and 1,456 DEGs were detected between D4 and P1 and between P1 and P2, respectively, representing the two largest groups of DEGs among the eight comparisons.

### Hierarchical clustering of DEGs among the eight stages

Using log ratio values, we performed hierarchical clustering of DEGs expression. Expression levels during the molting cycle were divided into twenty-four categories based on K-means clustering. Detailed expression profile clusters during the eight stages are shown in S1 Fig. The largest group, subcluster 14, contains 1,056 DEGs with gene expression levels decreasing during the D2-D3 and D4-P1 transitions. Other subclusters containing over 300 members were subcluster 11 (622 DEGs), subcluster 10 (610 DEGs), subcluster 7 (358 DEGs), and subcluster 16 (353 DEGs) (Fig 3). These expression patterns not only indicate the diverse and complex interactions among genes, but also suggest that unigenes with similar expression patterns may have similar functions in the molting cycle.

### Gene ontology (GO) analysis of RNA-seq data

To associate genes exhibiting different expression patterns with morphological and physiological changes during the molting cycle, we performed gene ontology (GO) enrichment analysis using BLAST2GO. A total of 11,501 GO terms were associated with all DEGs. According to the secondary classification of the GO terms, these DEGs were sorted into 47 functional groups that belong to three main GO categories: biological processes, cellular components, and molecular functions, comprised of 4,885 (42.5%), 3,606 (31.4%), and 3,010 (26.1%) DEGs, respectively (Fig 4). In the three categories, the six subcategories; cell (GO:0005623), cell part (GO:0044464), binding (GO:0005488), catalytic (GO:0003824), cellular process (GO:0009987)

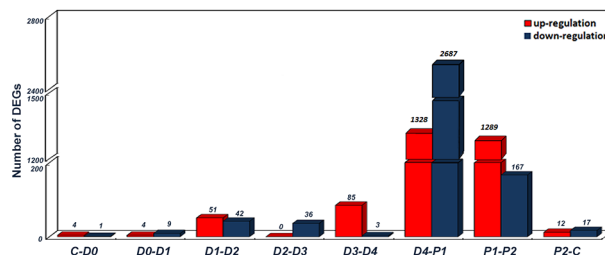

**Fig 2. Differentially expressed genes (DEGs) detected between eight comparisons of adjacent molting stages (C-D0, D0-D1, D1-D2, D2-D3, D3-D4, D4-P1, P1-P2, and P2-C).** The number of up-regulated and down-regulated genes between comparisons is given. The x-axis indicates adjacent stages in comparisons. The y-axis indicates the number of DEGs.

doi:10.1371/journal.pone.0144350.g002

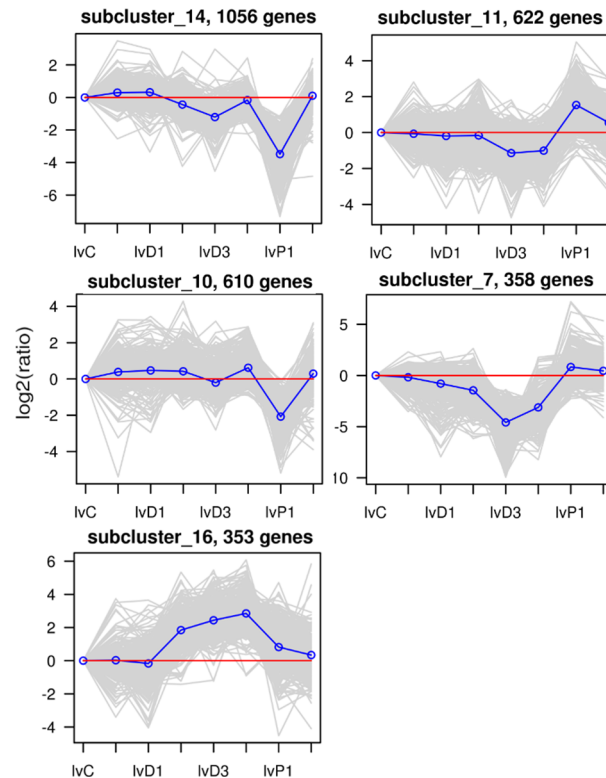

**Fig 3. The top five clusters determined by K-means clustering, including 2,999 DEGs (58.6% of all genes).** The x-axis indicates the molting stage. The y-axis indicates the  $\log_2(\text{ratio})$  of gene expression. Each grey row represents the relative expression of DEGs in a cluster. The blue line represents the average value of all members. The red line denotes reference, the line above the red line represents up-regulation, and the line below the red line represents down-regulation. The number of DEGs within a cluster is shown after that subcluster.

doi:10.1371/journal.pone.0144350.g003

and metabolic process (GO:0008152) were included in the top six most-abundant sub-groups. Moreover, the major sub-categories together with the enrichment of DEGs (Corrected P-Value < 0.05) among all molt stages were shown in [S2 Fig](#).

### KEGG pathway analyses

Gene interactions play an important role in biological functions. To understand potential gene interactions underlying the molting cycle, all DEGs were searched against the Kyoto Encyclopedia of Genes and Genomes (KEGG) database, and subsequently assigned to 259 pathways. Their expression during eight stages is detailed in [S4 Table](#). In eight comparisons, 0 (C-D0), 0 (D0-D1), 20 (D1-D2), 3 (D2-D3), 6 (D3-D4), 132 (D4-P1), 104 (P1-P2), and 119 (P2-C) pathways were enriched with DEGs, respectively. Moreover, we also found that pathways are dramatically enriched in D4-P1 and P1-P2 in terms of expression pattern and GO term analysis. Thus, we summarized the variance in KEGG pathways for molting behavior (D4-P1) and post-molt (P1-P2) ([Table 2](#)). The substantial variation in genetic pathways among developmental stages during molting might be related to morphological changes in the molting process.

### Expression pattern of hormone regulation genes

Hormones have an important role in controlling the crustacean molting cycle. In our study, eleven genes related to MIH and crustacean hyperglycemic hormone (CHH) were identified.



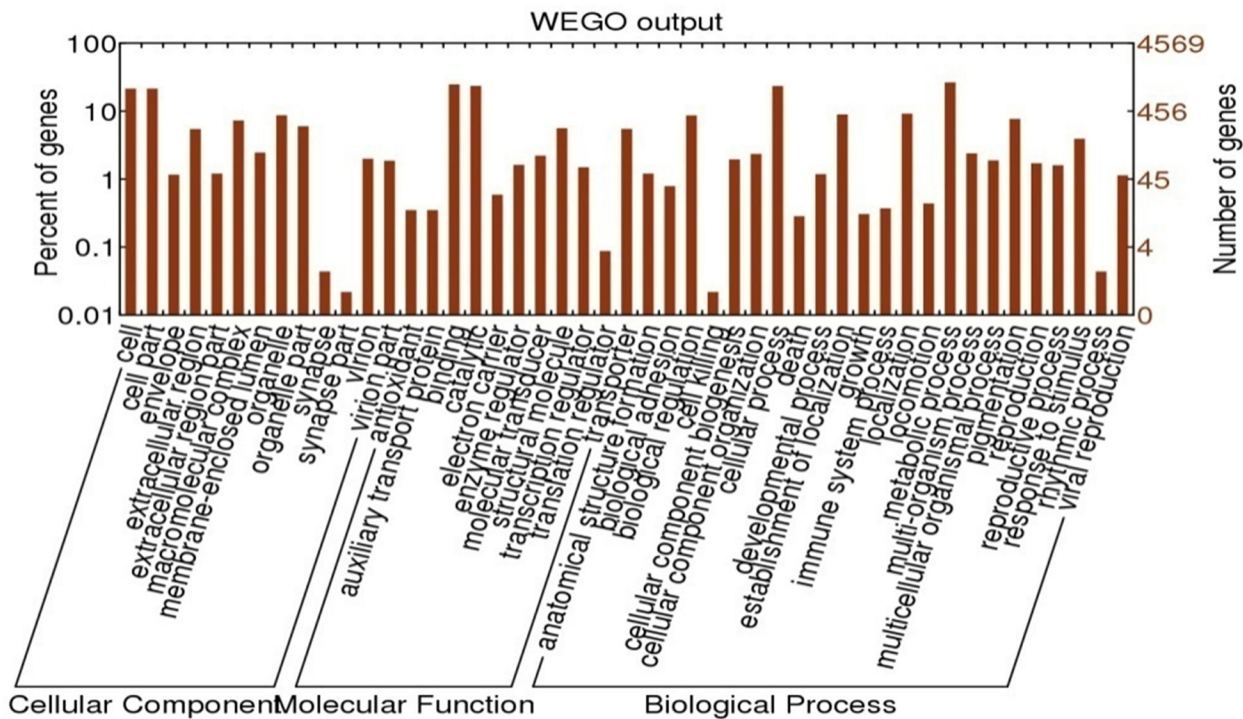

**Fig 4. Gene ontology (GO) classification of all DEGs.** The results are summarized in three main GO categories (cellular component, molecular function, and biological process). The x-axis represents GO subcategories. The left y-axis indicates the percentage of genes. The right y-axis indicates the number of DEGs.

doi:10.1371/journal.pone.0144350.g004

Interestingly, except for two unexpressed genes, down-regulated expressions were detected in D2-D3 in all others (Table 3). Moreover, we summarized the variance in transcript levels of molting related hormones. As a result, thirteen types of molting factors related to hormone regulation were identified. Interestingly, a trend of up-regulated transcript levels was found in all thirteen factors during D3-D4 (Table 4).

### Expression profile of skelemin genes

Expression analysis revealed high transcript levels of myosin, troponin, and actin following molting behavior (D4-P1). Members with high expression (FPKM value >1000 in at least one stage) were grouped together, and 49 members were found (6 were actin, 39 were myosin and 4 were troponin) (Table 5). Interestingly, 98% of the factors showed an up-regulated expression in D4-P1 (Table 5 bolded text). Some factors showed large changes in expression. For example, the FPKM values of actin T2 (c82047\_g1) and skeletal muscle actin 6 (c78558\_g1) increased more than 11,000 at D4-P1. Additionally, the FPKM values of myosin light chain (c26953\_g1) and myosin light chain 2 (c61912\_g2) increased more than 7,800, and those of troponin T (c70761\_g2 and c59125\_g1) increased more than 3,300 during molting.

### Expression pattern of immune related genes

To reveal the expression changes of the immune-related genes during molting, we summed the expression patterns of the immune pathways as a proxy for the immunity level of shrimp according to Li and Xiang (2013a,b) [53,54]. Thirty-six immunity families, including 236 immune genes, were categorized between molting stages. Clusters displayed expression

**Table 2. Significantly changed Kyoto Encyclopedia of Genes and Genomes (KEGG) pathways at pre-molt (D4–P1) and post-molt stages revealed by RNA-sequencing.**

|    | D4-P1                                            |                                                |                                                     | P1-P2                                                                |                                                    |                                                 |
|----|--------------------------------------------------|------------------------------------------------|-----------------------------------------------------|----------------------------------------------------------------------|----------------------------------------------------|-------------------------------------------------|
|    | Top 10 of member quantity                        | Top 10 of up-regulated pathway                 | Top 10 of down-regulated pathways                   | Top 10 of member quantity                                            | Top 10 of up-regulated pathways                    | Top 10 of down-regulated pathways               |
| 1  | Lysosome (55)                                    | Tight junction (65566)                         | Pancreatic secretion (-15672)                       | Lysosome (33)                                                        | Pancreatic secretion (13332)                       | Tight junction (-74056)                         |
| 2  | Phagosome (22)                                   | Focal adhesion (20354)                         | Protein digestion and absorption (-15559)           | Metabolism of xenobiotics by cytochrome P450 (16)                    | Protein digestion and absorption (13067)           | Adrenergic signaling in cardiomyocytes (-25196) |
| 3  | Amino sugar and nucleotide sugar metabolism (21) | Leukocyte transendothelial migration (19990)   | Neuroactive ligand-receptor interaction (-13096)    | Drug metabolism—cytochrome P450 (15)                                 | Neuroactive ligand-receptor interaction (11855)    | Focal adhesion (-24518)                         |
| 4  | Glutathione metabolism (20)                      | Regulation of actin cytoskeleton (19556)       | Lysosome (-10954)                                   | Amino sugar and nucleotide sugar metabolism (15)                     | Complement and coagulation cascades (9913)         | Leukocyte transendothelial migration (-23530)   |
| 5  | Starch and sucrose metabolism (18)               | Adrenergic signaling in cardiomyocytes (18211) | Complement and coagulation cascades (-10834)        | Glutathione metabolism (14)                                          | Lysosome (9024)                                    | Regulation of actin cytoskeleton (-23032)       |
| 6  | Peroxisome (17)                                  | Cardiac muscle contraction (16315)             | Antigen processing and presentation (-7150)         | Starch and sucrose metabolism (13)                                   | Ribosome (7665)                                    | Cardiac muscle contraction (-22476)             |
| 7  | Other glycan degradation(16)                     | Phototransduction- fly (13935)                 | Ribosome (-6336)                                    | Sphingolipid metabolism (11)                                         | Amino sugar and nucleotide sugar metabolism (5726) | Phototransduction–fly (-14495)                  |
| 8  | Carbon metabolism (16)                           | Oxytocin signaling pathway (13035)             | Oxidative phosphorylation (-4876)                   | Peroxisome (11)                                                      | Antigen processing and presentation (5712)         | Oxytocin signaling pathway (-14393)             |
| 9  | Galactose metabolism (15)                        | Rap1 signaling pathway (12426)                 | Amino sugar and nucleotide sugar metabolism (-4854) | Galactose metabolism (10)                                            | Oxidative phosphorylation (3876)                   | Rap1 signaling pathway (-13989)                 |
| 10 | Glycerolipid metabolism (14)                     | Adherens junction (12098)                      | Carbohydrate digestion and absorption (-4516)       | Arachidonic acid metabolism (10)<br>Biosynthesis of amino acids (10) | Protein processing in endoplasmic reticulum (2354) | Adherens junction (-13081)                      |

The top 10 up-regulating pathways and top 10 down-regulating pathways were identified by subtracting the fragments per kilobase of exon per million fragments mapped (FPKM) of D4 from P1 (P1 – D4) and P1 from P2 (P2 – P1). Digits in brackets indicate the number of differentially expressed genes (DEGs) and conversion of FPKM.

doi:10.1371/journal.pone.0144350.t002

patterns for a subset of all immunity genes in each comparison (Fig 5). Interestingly, most immune factors were up-regulated in D3-D4, including thirty-two clusters (32/36 clusters, 81.8% of all 236 genes). During molting behavior (D4-P1), some immune factors were up-regulated, including 16 cluster factors, and the majority was consist of crustin and anti-lipopolysaccharide factor (ALF), which demonstrated expression (FPKM value) level increases of 7.6 and 3.3 folds, respectively, after ecdysis.

### Expression changes of hemocyanin, chitinase and serine protease superfamily in molt process

To identify the possible factors involved in the molting process, we investigated the expression profile of members of the hemocyanin, chitinase and serine protease superfamily during the molting process. Data mining of the annotated genes identified twelve genes associated with hemocyanin. Similarly, 19, 16, and five genes were found to be related to serine proteinase, trypsin, and chymotrypsin, respectively. Twenty-three unigenes related to chitinase were

**Table 3. Gene expression data and descriptions of 11 CHH- and MIH-related genes in the molting cycle.**

| Gene_id    | Description                                             | Expression |      |      |              |             |       |       |      |
|------------|---------------------------------------------------------|------------|------|------|--------------|-------------|-------|-------|------|
|            |                                                         | C          | D0   | D1   | D2           | D3          | D4    | P1    | P2   |
| c104285_g1 | <i>L.vannamei</i> molt inhibiting hormone (MIH) gene    | 0          | 0.36 | 0.46 | <b>0.94</b>  | <b>0.38</b> | 0     | 0     | 0.31 |
| c52158_g1  | Lv-MIH1 precursor                                       | 1.11       | 0.26 | 1.85 | <b>1.14</b>  | <b>0</b>    | 1.05  | 1.36  | 1.60 |
| c24194_g1  | Lv-MIH1 precursor                                       | 0.25       | 0    | 0.30 | 0            | 0           | 0     | 0.39  | 0.41 |
| c40493_g1  | molt-inhibiting hormone 1                               | 0          | 0.38 | 0    | <b>0.63</b>  | <b>0</b>    | 0     | 1.59  | 0.66 |
| c65262_g1  | <i>L.vannamei</i> hyperglycemic hormone (CHH) mRNA      | 0.86       | 1.22 | 1.86 | <b>0.95</b>  | <b>0</b>    | 0.17  | 0.88  | 0.63 |
| c65241_g1  | hyperglycemic hormone-like peptide precursor            | 3.36       | 2.53 | 2.14 | <b>25.47</b> | <b>8.43</b> | 14.33 | 5.31  | 2.98 |
| c81385_g1  | Crustacean hyperglycemic hormone precursor              | 6.56       | 4.26 | 3.63 | <b>6.88</b>  | <b>4.23</b> | 4.38  | 11.61 | 3.85 |
| c58264_g1  | Crustacean hyperglycemic hormones 4                     | 0.47       | 0.21 | 0.94 | <b>0.38</b>  | <b>0</b>    | 0     | 0.68  | 0.58 |
| c64907_g1  | Crustacean hyperglycemic hormone-like peptide precursor | 0.71       | 1.15 | 1.15 | <b>3.26</b>  | <b>0.47</b> | 1.70  | 4.99  | 2.93 |
| c75623_g1  | Crustacean hyperglycemic hormones 2                     | 6.01       | 3.66 | 3.24 | <b>4.86</b>  | <b>0.29</b> | 3.72  | 7.05  | 3.68 |
| c72475_g2  | Crustacean hyperglycemic hormone 3 precursor            | 0          | 0    | 0.34 | 0            | 0           | 0     | 0     | 0.12 |

Expressions levels are represented by fragments per kilobase of exon per million fragments mapped (FPKM) at each stage. Bold text denotes down-regulation at D2 and D3. Changes in c65241\_g1 expression between D2 and D3 meet the criterion of differentially expressed genes ( $\log_2\text{ratio} \geq 1$  and  $\text{FDR} \leq 0.001$ ).

doi:10.1371/journal.pone.0144350.t003

identified in this study. The expression profile of hemocyanin genes showed a characteristic pattern of up-regulation at inter-molt and down-regulation during D1-D3. In D3-D4, expression was up-regulated, and then declined to the minimum in P1 (Fig 6). Surprisingly, the expression profile of hemocyanin and chitinase were consistent. The expression data revealed that genes corresponding to chitinase were preferentially expressed during periods D1 and D4. Moreover, similar expression patterns were observed in three serine protease superfamily members, including serine protease, trypsin, and chymotrypsin. Serine protease, trypsin, and chymotrypsin displayed expression changes similar to hemocyanin and chitinase, up-regulated in C-D0, D3-D4, and P1-P2 (Fig 6).

### Real-time quantitative PCR validation of RNA-seq results

To validate sequencing data, six differentially expressed genes were selected for real-time qPCR analysis. Expression patterns of the selected genes determined by real-time qPCR (Fig 7) are consistent with those determined by RNA-seq, corroborating our results.

## Discussion

### Establishment of an overall transcriptome database for the molting process

The results of the transcriptome analysis presented here establish a genome-wide transcriptional landscape for further studies on the developmental and molecular aspects of the molting process in *L. vannamei*. In terms of RNA-seq results, it was found that the expression changed markedly in D4-P1 and P1-P2. It is known that molting behavior occurs in D4-P1, while P1-P2 is the recovery stage [2]. There is an obvious morphological diversity between these stages. However, the molecular mechanisms involved in molting behavior are not fully elucidated. Our RNA-seq results provide useful insights into the molecular processes underlying these behaviors.

By profiling gene expressions and expression changes, it was found that down-regulated genes were predominant in D4-P1, while in P1-P2, various genes were mainly up-regulated

**Table 4. Expression levels of hormone related molting genes.**

| Factor name                              | Gene Number | Expression |        |        |        |               |               |        |        | Gene ID                                                                     | Reference                                                               |
|------------------------------------------|-------------|------------|--------|--------|--------|---------------|---------------|--------|--------|-----------------------------------------------------------------------------|-------------------------------------------------------------------------|
|                                          |             | C          | D0     | D1     | D2     | D3            | D4            | P1     | P2     |                                                                             |                                                                         |
| Ecdysteroid regulated-like protein       | 6           | 678.42     | 715.77 | 671.63 | 366.40 | <b>187.66</b> | <b>489.67</b> | 57.31  | 672.91 | c19570_g1<br>c81580_g1<br>c65832_g1<br>c72607_g1<br>c74657_g1<br>c106886_g1 | Margamet <i>et al.</i> , 2006 [40]                                      |
| Molting fluid carboxypeptidase           | 4           | 13.04      | 12.32  | 11.83  | 16.76  | <b>9.34</b>   | <b>38.48</b>  | 19.61  | 13.34  | c80306_g1<br>c74916_g2<br>c69559_g1<br>c64320_g1                            | Ote <i>et al.</i> , 2005 [41]                                           |
| Ecdysone receptor (ECR)                  | 2           | 11.6       | 12.48  | 15.19  | 22.34  | <b>9.78</b>   | <b>14.20</b>  | 11.35  | 14.66  | c72141_g9<br>c75175_g1                                                      | Duricaet <i>et al.</i> , 2002 [42]<br>Seearet <i>et al.</i> , 2010 [19] |
| Ecdysone-induced protein 74EF            | 1           | 4.30       | 3.65   | 3.31   | 20.40  | <b>10.96</b>  | <b>11.50</b>  | 6.33   | 4.70   | c70692_g1                                                                   | Burtis <i>et al.</i> , 1990 [43]                                        |
| Ecdysteroid receptor E75                 | 1           | 21.94      | 13.04  | 13.60  | 12.17  | <b>98.14</b>  | <b>126.99</b> | 25.76  | 16.57  | c76549_g1                                                                   | Priya <i>et al.</i> , 2010 [18]                                         |
| Ecdysone-induced protein 78              | 1           | 0.28       | 0.31   | 0.23   | 0.60   | <b>1.37</b>   | <b>2.68</b>   | 0.37   | 0.35   | c78631_g1                                                                   | Wu <i>et al.</i> , 2008 [44]                                            |
| Retinoid-X receptors (RXR)               | 2           | 8.95       | 9.09   | 10.42  | 10.34  | <b>6.46</b>   | <b>9.33</b>   | 18.01  | 13.03  | c74810_g1<br>c74810_g2                                                      | Priya <i>et al.</i> , 2009 [17]<br>Duricaet <i>et al.</i> , 2014 [45]   |
| Methyl farnesoate (MF)                   | 1           | 15.79      | 12.15  | 10.02  | 8.51   | <b>2.13</b>   | <b>3.66</b>   | 13.51  | 23.06  | c40589_g1                                                                   | Borst <i>et al.</i> , .1987 [46].<br>Nagaraju 2007 [47]                 |
| Farnesoic acid (FA)                      | 2           | 459.21     | 478.11 | 335.73 | 300.28 | <b>267.66</b> | <b>374.55</b> | 154.61 | 412.46 | c69785_g1<br>c75001_g2                                                      | Li <i>et al.</i> , .2013 [48]                                           |
| Vitellogenin gene (VG)                   | 5           | 52.00      | 126.24 | 99.32  | 34.45  | <b>3.32</b>   | <b>52.67</b>  | 29.21  | 55.32  | c129870_g1<br>c47984_g2<br>c72701_g1<br>c79730_g7<br>c83835_g1              | Shechter <i>et al.</i> , 2005 [49]                                      |
| 17-beta-dehydrogenase                    | 1           | 31.60      | 21.34  | 27.54  | 19.91  | <b>3.93</b>   | <b>12.51</b>  | 3.24   | 32.56  | c71230_g1                                                                   | Mindnich <i>et al.</i> , 2004 [50]                                      |
| Pigment dispersing hormone (PDH)         | 1           | 3.93       | 2.97   | 3.18   | 3.66   | <b>3.58</b>   | <b>4.35</b>   | 4.39   | 2.70   | c82344_g1                                                                   | Christie <i>et al.</i> , 2014 [51]                                      |
| Red pigment-concentrating hormone (RPCH) | 1           | 4.99       | 5.28   | 2.81   | 4.96   | <b>0.17</b>   | <b>4.33</b>   | 7.11   | 3.11   | c37749_g1                                                                   | Sathapondechaet <i>et al.</i> , 2014 [52]                               |

Molting hormone-related factors and fragments per kilobase of exon per million fragments mapped (FPKM) are shown for each stage. Expression represents the FPKM value of combined factors. Bold text denotes up-regulated expression in D3 and D4. The reports about genes related to molting hormone were used as the reference.

doi:10.1371/journal.pone.0144350.t004

(Fig 2). Based on this result, the DEGs enriched in GO terms related to the shrimp metabolism level were significantly down-regulated during D4-P1. The top five down-regulated terms were GO:0009987 “cellular process” (294 down-regulated DEGs), GO:0008152 “metabolic process” (288 down-regulated DEGs), GO:0005488 “binding” (276 down-regulated DEGs), GO:0071704 “organic substance metabolic process” (249 down-regulated DEGs), and GO:0003824 “catalytic activity” (232 down-regulated DEGs). While the GO terms in P1-P2 were majorly up-regulated, the terms which showed down-regulation in D4-P1 were up-regulated back. Moreover, DEGs for pancreatic secretion (map04972), protein digestion and absorption (map04974), neuroactive ligand-receptor interaction (map04080), lysosome (map04142), and other pathways were down-regulated during D4-P1. In P1-P2, however,

Table 5. Expression levels of actin, myosin and troponin genes.

| gene_id       | Expression |          |          |          |          |                 |                 |          | Description                                                                  |
|---------------|------------|----------|----------|----------|----------|-----------------|-----------------|----------|------------------------------------------------------------------------------|
|               | C          | D0       | D1       | D2       | D3       | D4              | P1              | P2       |                                                                              |
| <b>Actin</b>  |            |          |          |          |          |                 |                 |          |                                                                              |
| c82047_g1     | 20849.17   | 11760.99 | 8767.04  | 17445.72 | 37490.78 | <b>14821.08</b> | <b>27282.26</b> | 12889.42 | actin T2 [ <i>Litopenaeus vannamei</i> ]                                     |
| c78558_g1     | 19381.33   | 12253.83 | 11127.16 | 15866.74 | 29958.74 | <b>13252.85</b> | <b>24546.41</b> | 13282.95 | skeletal muscle actin 6 [ <i>Homarus americanus</i> ]                        |
| c82047_g2     | 5452.26    | 4508.13  | 3889.94  | 5610.92  | 7692.16  | <b>5088.78</b>  | <b>5698.87</b>  | 4280.14  | actin [ <i>Hypochilus thorelli</i> ]                                         |
| c1146_g1      | 551.34     | 356.10   | 353.85   | 522.41   | 1019.68  | <b>482.48</b>   | <b>815.53</b>   | 442.82   | PREDICTED: similar to alpha actinin CG4376-PB [ <i>Tribolium castaneum</i> ] |
| c64985_g1     | 582.23     | 285.86   | 189.72   | 431.65   | 1147.69  | <b>409.86</b>   | <b>573.96</b>   | 349.84   | beta-actin [ <i>Scylla paramamosain</i> ]                                    |
| c67471_g1     | 5305.29    | 5754.25  | 4079.25  | 5732.58  | 4737.16  | 5551.05         | 4644.41         | 5148.22  | actin E [ <i>Litopenaeus vannamei</i> ]                                      |
| <b>Myosin</b> |            |          |          |          |          |                 |                 |          |                                                                              |
| c26953_g1     | 18358.27   | 9826.73  | 8751.77  | 13851.15 | 30821.99 | <b>13627.39</b> | <b>21918.84</b> | 11310.27 | myosin light chain [ <i>Marsupenaeus japonicus</i> ]                         |
| c61912_g2     | 17348.02   | 8694.49  | 5830.68  | 12411.85 | 29644.34 | <b>12465.05</b> | <b>20273.25</b> | 10038.46 | myosin light chain 2 [ <i>Procambarus clarkii</i> ]                          |
| c83685_g5     | 6013.84    | 3319.11  | 3139.47  | 5724.11  | 10316.04 | <b>4682.86</b>  | <b>8209.14</b>  | 4013.95  | myosin heavy chain type a [ <i>Marsupenaeus japonicus</i> ]                  |
| c83685_g6     | 5284.95    | 3459.07  | 2954.50  | 4903.49  | 9770.18  | <b>4029.98</b>  | <b>6860.66</b>  | 3898.41  | myosin heavy chain [ <i>Farfantepenaeus paulensis</i> ]                      |
| c83685_g2     | 5493.96    | 3169.90  | 2752.71  | 4762.17  | 10266.71 | <b>4064.44</b>  | <b>6762.04</b>  | 3497.44  | myosin heavy chain type 2 [ <i>Penaeus monodon</i> ]                         |
| c71354_g2     | 5380.86    | 3220.31  | 2368.17  | 4408.20  | 8691.22  | <b>4199.79</b>  | <b>6297.09</b>  | 3648.19  | Tropomyosin                                                                  |
| c59746_g1     | 4283.22    | 2365.53  | 2251.28  | 3796.17  | 8245.85  | <b>3350.06</b>  | <b>5367.31</b>  | 2700.07  | myosin heavy chain type b [ <i>Marsupenaeus japonicus</i> ]                  |
| c83685_g3     | 3713.36    | 1950.47  | 1416.29  | 3185.80  | 6668.01  | <b>2855.43</b>  | <b>4750.30</b>  | 2330.42  | myosin heavy chain type a [ <i>Marsupenaeus japonicus</i> ]                  |
| c83685_g7     | 3350.25    | 1845.41  | 1403.93  | 3129.62  | 6009.07  | <b>2616.69</b>  | <b>4487.76</b>  | 2277.59  | myosin heavy chain type 1 [ <i>Penaeus monodon</i> ]                         |
| c80445_g4     | 2002.07    | 1569.03  | 1140.62  | 2575.80  | 2775.48  | <b>1849.93</b>  | <b>3697.77</b>  | 2244.00  | myosin heavy chain type a [ <i>Marsupenaeus japonicus</i> ]                  |
| c73388_g1     | 3341.68    | 1750.24  | 1518.60  | 2894.58  | 5650.37  | <b>2522.68</b>  | <b>4290.25</b>  | 2141.69  | myosin heavy chain type 1 [ <i>Litopenaeus vannamei</i> ]                    |
| c72756_g3     | 3191.01    | 1910.18  | 1279.89  | 3158.56  | 5343.45  | <b>2612.57</b>  | <b>4215.41</b>  | 2172.07  | myosin heavy chain type b [ <i>Marsupenaeus japonicus</i> ]                  |
| c83685_g1     | 2957.29    | 1762.68  | 1486.49  | 2904.02  | 5242.33  | <b>2381.47</b>  | <b>3902.89</b>  | 1990.97  | myosin heavy chain type 2 [ <i>Litopenaeus vannamei</i> ]                    |
| c56242_g1     | 1817.63    | 1214.37  | 817.26   | 1998.79  | 2457.60  | <b>1438.90</b>  | <b>2919.95</b>  | 1696.15  | myosin heavy chain [ <i>Farfantepenaeus paulensis</i> ]                      |
| c83685_g4     | 2487.71    | 1667.46  | 1287.52  | 2516.83  | 4704.41  | <b>1959.07</b>  | <b>3307.62</b>  | 1842.34  | myosin heavy chain type 2 [ <i>Litopenaeus vannamei</i> ]                    |
| c28182_g1     | 1241.64    | 957.46   | 468.61   | 2004.75  | 1439.54  | <b>1270.13</b>  | <b>2572.92</b>  | 1532.49  | myosin heavy chain type 1 [ <i>Litopenaeus vannamei</i> ]                    |
| c70174_g1     | 1293.27    | 989.18   | 687.60   | 1728.27  | 1600.99  | <b>1204.38</b>  | <b>2383.42</b>  | 1419.61  | myosin heavy chain type a [ <i>Marsupenaeus japonicus</i> ]                  |
| c81295_g1     | 2174.39    | 1454.10  | 1238.15  | 2324.49  | 3751.85  | <b>1746.31</b>  | <b>2886.82</b>  | 1608.96  | myosin heavy chain type 2 [ <i>Litopenaeus vannamei</i> ]                    |
| c72756_g5     | 1906.57    | 1181.00  | 855.85   | 2022.35  | 3457.55  | <b>1658.71</b>  | <b>2737.90</b>  | 1386.27  | myosin heavy chain type 2 [ <i>Penaeus monodon</i> ]                         |
| c80636_g6     | 1173.97    | 834.21   | 622.22   | 1483.74  | 1867.45  | <b>1047.43</b>  | <b>1914.98</b>  | 1055.14  | myosin heavy chain type a [ <i>Marsupenaeus japonicus</i> ]                  |
| c73679_g4     | 1287.09    | 1064.99  | 891.33   | 1744.40  | 2259.05  | <b>1153.50</b>  | <b>2002.83</b>  | 1179.03  | myosin heavy chain type 2 [ <i>Penaeus monodon</i> ]                         |

(Continued)

Table 5. (Continued)

| gene_id         | Expression |         |         |          |          |                 |                 |         | Description                                                 |
|-----------------|------------|---------|---------|----------|----------|-----------------|-----------------|---------|-------------------------------------------------------------|
|                 | C          | D0      | D1      | D2       | D3       | D4              | P1              | P2      |                                                             |
| c75308_g3       | 1160.26    | 763.11  | 581.75  | 1150.50  | 2075.74  | <b>898.38</b>   | <b>1710.23</b>  | 939.38  | myosin heavy chain [ <i>Farfantepenaeus paulensis</i> ]     |
| c65216_g3       | 762.80     | 614.08  | 496.68  | 1087.12  | 929.43   | <b>748.72</b>   | <b>1523.21</b>  | 845.22  | myosin heavy chain type 1 [ <i>Penaeus monodon</i> ]        |
| c54630_g1       | 757.96     | 388.83  | 381.84  | 901.29   | 1239.59  | <b>556.49</b>   | <b>1166.68</b>  | 570.87  | myosin heavy chain type 2 [ <i>Litopenaeus vannamei</i> ]   |
| c80636_g3       | 606.17     | 465.76  | 292.61  | 874.87   | 637.77   | <b>563.28</b>   | <b>1168.67</b>  | 692.98  | myosin heavy chain type 1 [ <i>Litopenaeus vannamei</i> ]   |
| c67474_g3       | 658.03     | 537.14  | 522.17  | 708.15   | 885.97   | <b>578.37</b>   | <b>1151.96</b>  | 547.11  | myosin heavy chain type b [ <i>Marsupenaeus japonicus</i> ] |
| c131544_g1      | 1001.89    | 456.89  | 474.76  | 748.11   | 1719.62  | <b>658.40</b>   | <b>1207.93</b>  | 506.46  | myosin heavy chain type 1 [ <i>Penaeus monodon</i> ]        |
| c76934_g4       | 241.76     | 231.68  | 124.32  | 237.08   | 148.35   | <b>170.21</b>   | <b>709.00</b>   | 343.57  | myosin light chain [ <i>Penaeus monodon</i> ]               |
| c80445_g3       | 1158.72    | 660.06  | 569.76  | 983.21   | 2504.93  | <b>890.92</b>   | <b>1403.62</b>  | 727.07  | myosin heavy chain type a [ <i>Marsupenaeus japonicus</i> ] |
| c61703_g1       | 577.82     | 370.49  | 161.21  | 639.87   | 840.82   | <b>507.30</b>   | <b>1014.06</b>  | 496.98  | myosin heavy chain type 1 [ <i>Litopenaeus vannamei</i> ]   |
| c56973_g1       | 723.62     | 583.59  | 743.88  | 622.63   | 1086.04  | <b>512.81</b>   | <b>977.64</b>   | 588.23  | myosin heavy chain type a [ <i>Marsupenaeus japonicus</i> ] |
| c26953_g2       | 15234.89   | 7968.36 | 5883.06 | 11377.27 | 25713.28 | <b>11059.43</b> | <b>18522.19</b> | 9214.75 | <i>Marsupenaeus japonicus</i> myosin light chain mRNA       |
| c60870_g1       | 457.39     | 207.31  | 203.58  | 266.65   | 1093.96  | <b>283.22</b>   | <b>486.43</b>   | 176.09  | myosin heavy chain type 1 [ <i>Penaeus monodon</i> ]        |
| c49254_g1       | 461.37     | 176.57  | 179.47  | 261.17   | 1069.88  | <b>289.38</b>   | <b>389.47</b>   | 168.66  | myosin heavy chain type a [ <i>Marsupenaeus japonicus</i> ] |
| c44371_g1       | 800.12     | 582.47  | 469.72  | 675.81   | 1261.00  | <b>657.07</b>   | <b>1080.53</b>  | 610.90  | paramyosin [ <i>Papilio xuthus</i> ]                        |
| c75308_g4       | 652.67     | 368.88  | 264.29  | 572.09   | 1413.10  | <b>537.57</b>   | <b>838.36</b>   | 469.15  | myosin heavy chain [ <i>Farfantepenaeus paulensis</i> ]     |
| c44674_g2       | 617.30     | 446.94  | 628.45  | 518.82   | 1321.63  | <b>443.16</b>   | <b>740.85</b>   | 410.36  | muscle myosin heavy chain [ <i>Papilio xuthus</i> ]         |
| c73679_g12      | 679.31     | 360.95  | 342.99  | 551.67   | 1214.87  | <b>506.63</b>   | <b>784.06</b>   | 405.63  | myosin heavy chain type 2 [ <i>Penaeus monodon</i> ]        |
| c54360_g1       | 686.35     | 447.84  | 349.10  | 491.94   | 1021.10  | <b>527.31</b>   | <b>822.92</b>   | 468.13  | myosin heavy chain isoform 3 [ <i>Ocypode quadrata</i> ]    |
| <b>Troponin</b> |            |         |         |          |          |                 |                 |         |                                                             |
| c70761_g2       | 7319.28    | 4474.64 | 3958.16 | 6386.01  | 12737.54 | <b>5811.09</b>  | <b>9338.42</b>  | 5377.96 | Troponin T [ <i>Lepeophtheirus salmonis</i> ]               |
| c59125_g1       | 7150.50    | 3794.77 | 3426.53 | 5099.38  | 10466.81 | <b>4802.50</b>  | <b>8132.46</b>  | 4293.31 | troponin I [ <i>Litopenaeus vannamei</i> ]                  |
| c81020_g2       | 1656.78    | 878.59  | 824.72  | 1419.39  | 1964.06  | <b>1214.66</b>  | <b>2228.47</b>  | 1118.01 | troponin C1 [ <i>Litopenaeus vannamei</i> ]                 |
| c81020_g3       | 800.81     | 349.56  | 280.64  | 353.36   | 1150.26  | <b>534.82</b>   | <b>582.99</b>   | 321.51  | troponin C [ <i>Penaeus monodon</i> ]                       |

Skelemin related factors and fragments per kilobase of exon per million fragments mapped (FPKM) are shown for each stage. Bolded text denotes up-regulated expression in D4-P1.

doi:10.1371/journal.pone.0144350.t005

protein digestion and absorption, neuroactive ligand-receptor interaction, and lysosome-related pathways were recovered (up-regulated). These results were consistent with the morphological changes and the variation in molecular changes between molting behavior and post-molt. In summary, the RNA-seq results provide the basal understanding for the molecular changes occurring during the molting process.

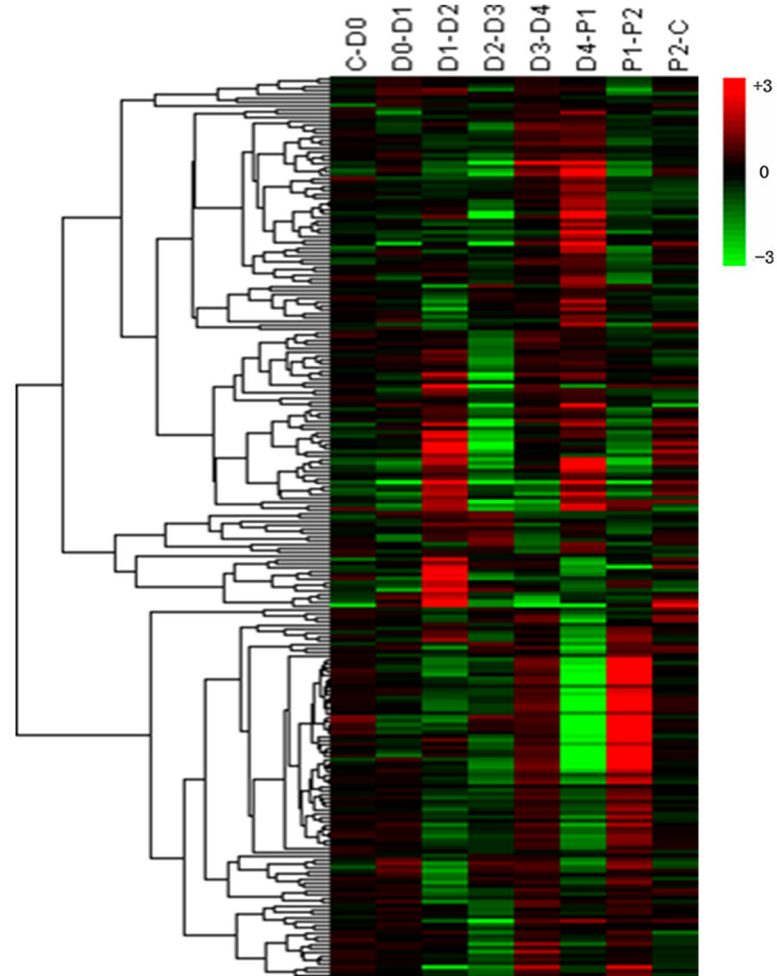

**Fig 5. Hierarchical clustering of 236 immunity genes.** Colored keys represent the fold changes ( $\log_2$  transformed counts) of gene expression between adjacent molt stages Red represents up-regulation and green represents down-regulation. Each column represents an experimental condition (e.g. C-D0), and each row represents an immunity gene.

doi:10.1371/journal.pone.0144350.g005

### Hormone regulation process in *L. vannamei* molting

It is now well established that MIH and CHH peptide families serve as key regulators of hormones controlling the molting process [55]. MIH, which is secreted from a neuro-secretory

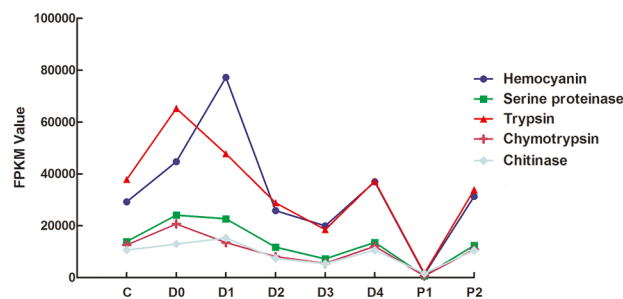

**Fig 6. Expression profiles of hemocyanin, serine proteinase, trypsin, chymotrypsin, and chitinase.** The x-axis represents developmental stages. The line represents the total fragments per kilobase of exon per million fragments mapped (FPKM) for the genes.

doi:10.1371/journal.pone.0144350.g006

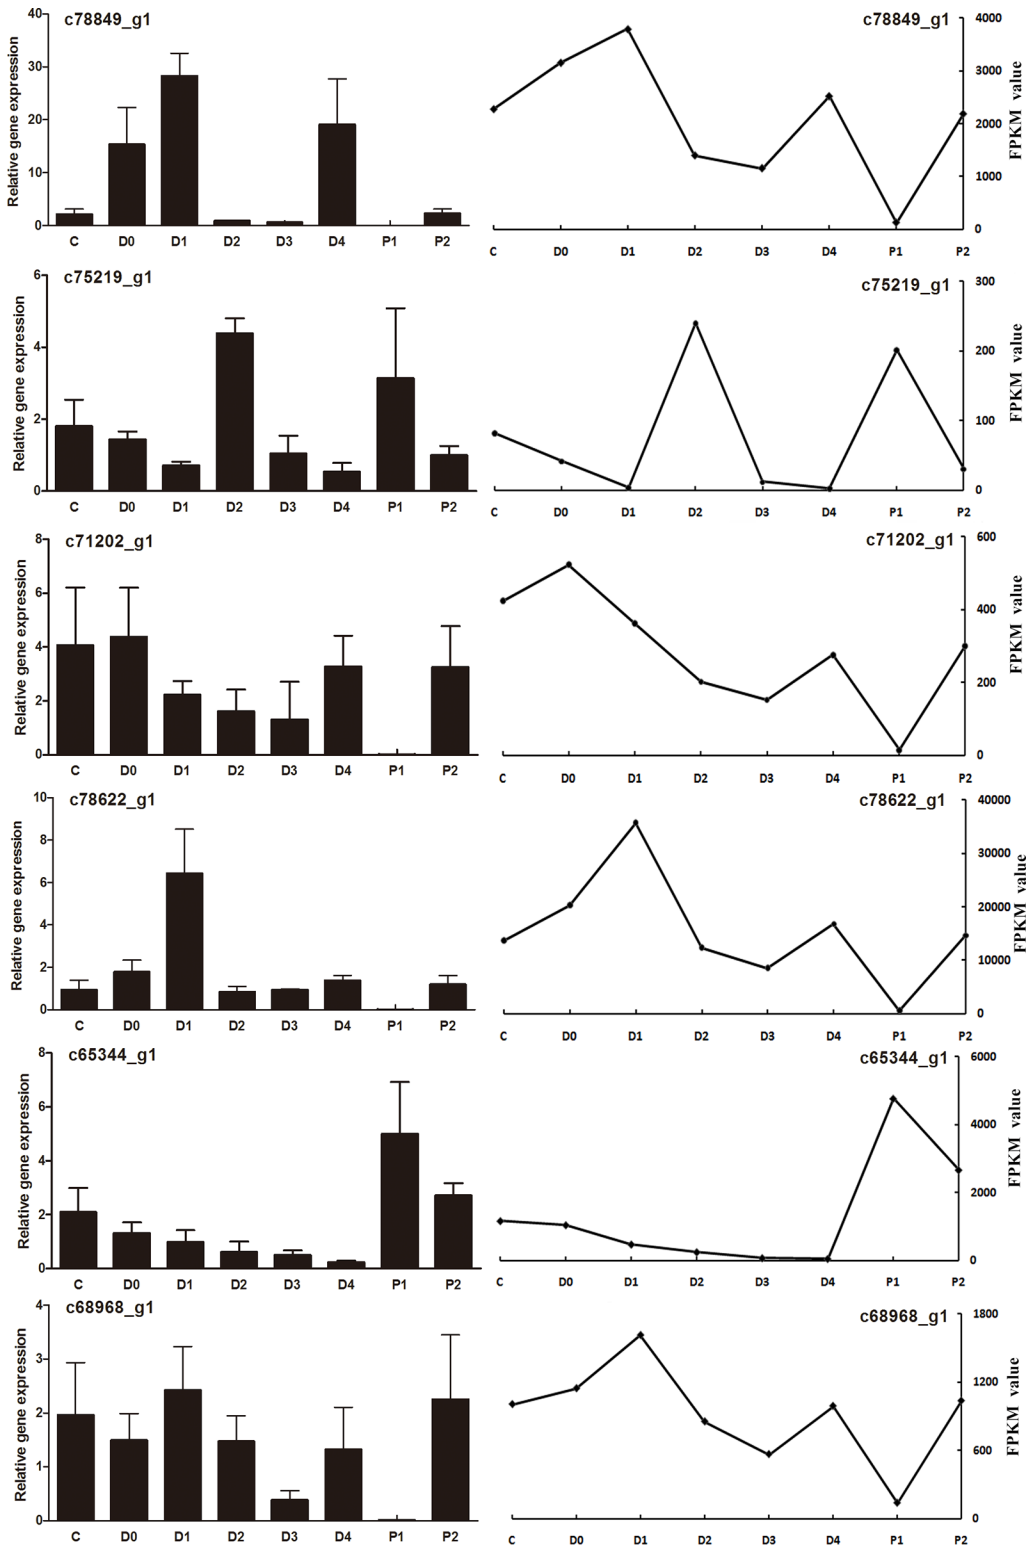

**Fig 7. Real-time quantitative PCR (qRT-PCR).** Six candidate genes were selected randomly for validation. Expression results of qRT-PCR are shown on the left and expression profiles of RNA-sequencing on the right. The gene *c82047\_g1 (Actin T2)* was used as the control reference gene.

doi:10.1371/journal.pone.0144350.g007



center termed the X-organ/sinus gland complex (XO/SG) in crustacean eyestalks, is a member of the CHH family [13,56]. Extirpation of XO/SG can reduce MIH secretion, enable ecdysteroid synthesis, and improve molt frequency [57]. In our study, down-regulated expressions of all MIH and CHH were detected in D2-D3 (Table 3). Based on the inhibitory effect of MIH and CHH on ecdysone secretion, this result suggests that down-regulation of MIH and CHH-related genes may trigger the molting process, and D2-D3 likely represents the onset of molt hormone-regulation. This speculation is supported further by physiological evidence that reduction in sinus gland MIH content occurs during the late pre-molt stage in *Procambarus clarkia* [58]. The concentration of MIH was found to decrease in pre-molt, followed by an increase in ecdysone in the hemolymph [55]. Furthermore, qualitative measurements of MIH mRNA transcript abundance found MIH peptide synthesis to be dramatically reduced during late pre-molt in eyestalks of *Callinectes sapidus* [59].

Only few studies have focused on the molecular role of molting-related hormones followed by MIH and CHH. To investigate hormones downstream of MIH and CHH in the molting process pathway and elucidate possible roles in this process, we summarized the variance in transcript levels of molting related hormones. According to the RNA-seq results, a trend of up-regulated transcript levels was found in all thirteen factors during D3-D4 (Table 4). Most of these factors were reported previously to be associated with molting; for example, ecdysone receptors (ECRs) and retinoid-X receptors (RXRs) have been found to be potential targets for hormonal control during limb regeneration and molting in *Uca pugilator* [45]. In this study, we also identified two ECRs genes (*c72141\_g9* and *c75175\_g1*) and two RXRs genes (*c74810\_g1* and *c74810\_g2*). Methyl farnesoate (MF) and farnesoic acid (FA), secreted by the mandibular organs (MO), might have specific stimulatory effects on Y-organs where ecdysteroids are secreted [47]. Synthesis of the vitellogenin gene (VG) in *Cherax quadricarinatus* has been shown to be induced by 20E, it has been suggested that VG is an ecdysteroid-responsive gene in the molt process [49]. In this study, a trend of up-regulated transcript levels was found in all twelve factors during D3-D4 (Table 4). In light of the fact that the D3-D4 stage occurs immediately before ecdysis, this result suggests that these hormones are associated with molting during the D3-D4 stage. Indeed, D3-D4 likely serves as the implementation phase for molt hormone-regulation. Moreover, the presence of specific up-regulated genes in the molt phase indicates that they could participate in hormone regulation and promote the molting process, as seen in three ecdysteroid-regulated genes (*c19570\_g1*, *c81580\_g1*, and *c65832\_g1*) whose expression increased 2.31, 2.82, and 3.45 fold during D3 to D4, respectively. Similarly, two molting fluid carboxy peptidase precursors (*c80306\_g1* and *c74916\_g2*) increased 3.21 and 24.5 fold in D3-D4. These genes, potentially involved in hormone regulation, will serve as promising candidates for future analyses.

In summary, we infer that hormone-regulated molting signals likely play distinctly different roles in shrimp molting. Our findings show the first step of molting to be the down-regulation of MIH and CHH family peptides in D2-D3 to initiate the process. Once inhibition by MIH and CHH is prevented, downstream hormones and other factors can participate in regulation in the D3-D4 stage of molting.

## Analysis of skelemin in molting process

Post-molt is a period of rapid enlargement and growth for shrimp as a result of body size expansion and exoskeleton reconstruction after ecdysis. The process is complex, involving not just fast water absorption, but also expansion of the skelemin to provide a scaffold and muscle to fill the new body [60]. Skelemin is important for body reconstruction after molting [61]. However, factors participating in enlargement as skelemin during the molting process have remained largely unknown. According to the RNA-seq results, genes related to actin, myosin and troponin were

markedly up-regulated after molting (D4-P1) (Table 5). Actin is a globular multi-functional protein that forms microfilaments and serves as the major component of muscle [62]. It is reported that the transcriptional response of actin (*PotActinSK1*, *PotActinSK2*, *PotActinHT*, and *PotActinCT*) to 20-hydroxyecdysone (20E) injection was different in *Portunus trituberculatus*, suggesting that 20E affects muscle plasticity [63]. Myosin is the major component of thick filaments in muscle, and troponin is a complex of three regulatory proteins (troponin C, troponin I, and troponin T) integral to muscle contraction in skeletal and cardiac muscle [64]. As the major contractile protein in vertebrates and invertebrates, myosin was identified to be associated with muscle atrophy during molting, which was characterized by decrease in fiber width and myofibril cross-sectional areas, increase in inter fibrillar spaces, and degradation [65,66]. Troponin and tropomyosin are modulatory proteins that modulate the binding of actin to myosin [67]. Indeed, body enlargement after molting requires frames and skelemin. Considering the expression profiles of actin, myosin, and troponin after molting (Table 5), our findings suggest that these three proteins are expressed abundantly along with skelemin to support the new body of the shrimp after the phase of molting behavior is complete.

### Immunity tactic during molting cycle in *L. vannamei*

Immediately following ecdysis, the new exoskeleton is soft and the exercise capacity of shrimp is very weak, so post-molt (P1) is the most sensitive period to suffer an attack from bacteria, viruses, or other predation. It is known that shrimp practice cannibalism which can abet the outbreak of infectious diseases such as White Spot Syndrome (WSS) [68] and the targets of cannibalism are mainly post-molt shrimp. The immune and protection tactics that allow post-molt shrimp to avoid stress are unknown. To address questions regarding post-molt defense, we summed the expression patterns of the immune pathways as a proxy for the immunity level of shrimp according to Li and Xiang (2013a,b) [53,54]. Interestingly, most immune factors were up-regulated in D3-D4. And during molting behavior (D4-P1), parts of immune factors were up-regulated, and the majority up-regulated factors were concentrated in the some downstream and executive factors of immune pathway, like crustin and ALF. Invertebrates including shrimp have no real adaptive immunity and mainly depend on their innate immunity against a variety of pathogens [69]. Antimicrobial peptides (AMPs) are important effectors in innate immunity, which is the front line of host defense against infection by microbes including bacteria, fungi, and viruses [70,71]. Crustin and ALF are important AMPs that play an important role in the immunity of shrimp [72]. Crustin (*MjCru I-1*) found in *Marsupenaeus japonicus* can bind to the cell wall molecules of bacteria, such as lipopolysaccharide (LPS), peptidoglycan (PGN), and lipoteichoic acid (LTA) [69]. *LvALF* from *Litopenaeus vannamei*, *MjALF* from *Marsupenaeus japonicus*, *PtALF* from *Portunus trituberculatus*, and *EsALF* from *Eriocheir sinensis* have also been reported to show broad-spectrum activity against gram-positive and gram-negative bacteria, fungi, and viruses [73–76].

In summary, we propose that shrimp will up-regulate the expression of immune-related genes initially in D3-D4. After ecdysis, several downstream factors, such as the antimicrobial peptides, and other factors, such as the i-type lysozyme-like protein 2 (*c72940\_g1*) that is up-regulated about 25-folds between D4 and P1, are likely to be expressed to generate an immune response. Once the exoskeleton hardens, the shrimp acquire new protection, and the expression of immune genes recovers to the baseline level.

### Expression changes of hemocyanin, chitinase and serine protease superfamily in molt process

Some factors have been reported to be associated with the molting process in previous studies. It reported that hemocyanin highly expressed in both the inter-molt and pre-molt periods is

reflective of the dual functionality of hemocyanin in preparation for arthropod ecdysis in *Portunus pelagicus* [77]. Studies have also confirmed that the molting process can affect hemocyanin levels in *L. vannamei* juveniles [78]. Chitinase is the main enzyme hydrolyzing the glycosidic bonds in chitin to digest old exoskeleton partially [79]. The structures of serine protease superfamily are very similar, even though they recognize different substrates [80–82]. The serine protease superfamily members and hemocyanin share phenoloxidase (PO) activity, and studies on *L. vannamei* have suggested the regulation of trypsin biosynthesis may be, at least in part, under the influence of ecdysteroid hormones [83]. Hence, in our study, expression of serine protease superfamily members correlates strongly with chitinase expression. Taken together with the functional relatedness of these enzymes, this result suggests a shared or similar function in degradation or digestion in the molting cycle. Moreover, the similarity in gene expression profiles of hemocyanin and these three members of the serine protease superfamily may be indicative of activation of the PO pathway. In this study, the RNA-seq results also illustrated that these factors might be associated with molting in *L. vannamei*.

### Other factors that may be associated with the molting process

Aquaporins (AQPs) are essential to facilitate the transport of water and other small polar molecules across cell membranes and play an important role in osmotic regulation [84]. After their escape from the confines of a cuticle, shrimp need to rapidly take up water [2]. One aquaporin gene, *c76592\_g1*, was identified in the molting transcriptome and its expression level was the highest after molting behavior (P1), which indicated that it played a role in osmotic regulation during the molting process.

The formation of chitin is catalyzed by chitin synthetase, a highly conserved enzyme involved in chitin synthesis [79]. One chitin synthetase gene (*c79847\_g1*) was found in the transcriptome result; expression analysis showed that it reached a peak in D4 and P2. Along with its functional annotation, chitin synthetase has been suggested to be involved in new cuticle synthesis in D4 and P2.

Myostatin (*MSTN/GDF11*) was identified to act as a negative regulator of muscle development in vertebrates and in the shrimp *Macrobrachium nipponense*. During the molt cycle, the expression of *Mn-MSTN/GDF11* mRNA was up-regulated significantly at the early post-molt stage, but later decreased gradually [85]. We also found one myostatin gene (*c72168\_g1*) in the molting transcriptome, and the expression pattern was similar to that in *Macrobrachium nipponense*, with an up-regulation at post-molt, followed by a down-regulation. These results indicated that myostatin may play a role in the molt cycle.

An earlier report showed that knockdown of a novel G-protein pathway suppressor 2 (*GPS2*) (GenBank accession number JN714124) led to mortality by exuvial entrapment during ecdysis in shrimp (*Penaeus vannamei*) [86]. In our study, we identified a *GPS2* gene, *c74297\_g2*, and its expression exhibited low variance levels; this gene was thought to be a housekeeping gene that acts during the molting cycle in *L. vannamei*.

### Comparison with results of transcriptomic analyses in other arthropods

There have been a number of previous reports on the transcriptomic analysis of the molting process in other arthropods. By analyzing the gene expression profiles in whole animals and organs previously identified to be related to molting by microarray analysis, Kuballa and Elizur performed differential expression profiling of components associated with exoskeletal hardening in the crab *P. pelagicus*. Moreover, it was found that the C-type lectin receptor, mannose binding protein, PO (trypsin-like, clotting protein precursor-like and antimicrobial proteins) inducers and antimicrobial proteins, in conjunction with hemocyanin, displayed molt cycle-related

differential expression profiles, which indicated that they had possible regulatory functions in the calcification or sclerotization cascade of the cuticle [87]. A microarray-based investigation was performed using mRNA collected from the larval stage to the pupal stage for analyzing the cuticular genes in the silkworm, *Bombyx mori* [88]. A total of 227 cuticular protein genes were found to be expressed, and their expression profiles and clustering was discussed. Custom cDNA microarrays were constructed for the crab *Portunus pelagicus* to analyze specific differential genes in the molt cycle [77]. By analyzing the expression profiles in thoracic exoskeleton formation during the pupal-to-adult molting in *Apis mellifera* by microarray analysis, it was found that 1,253 unique DEGs and 547 were up-regulated in the thoracic dorsum after molting, which suggested an induction of expression by the ecdysteroid pulse [89]. Furthermore, 28 of the 36 muscle-related DEGs were up-regulated during the formation of striated fibers attached to the exoskeleton. Another transcriptomic analysis focused on chitin metabolism in four stages (inter-molt, early pre-molt, late pre-molt and post-molt) in the crayfish *Cherax quadricarinatus* with regard to three key chitin metabolic processes, chitin synthesis, chitin breakdown, and the junction between the metabolism of simple sugars and amino sugars [90].

There were some similarities compared to the results of our work, for example, some common factors are considered to be related to the molt cycle, like the cuticular genes, PO family, chitin synthase, antimicrobial proteins and hemocyanin. However, several differences exist between our results and those of previous studies. These differences may be due to the difference in the techniques used (RNA-seq and microarray). The transcriptome database obtained using Illumina RNA-seq in our study was larger than that obtained by microarray-based analysis in other molting animals, and more genes were detected at each stage of the molting process in our study. Secondly, previous studies mainly focused on exoskeleton reconstruction, but hormone regulation, expression profiles during molting behavior, skelemin, and immunity

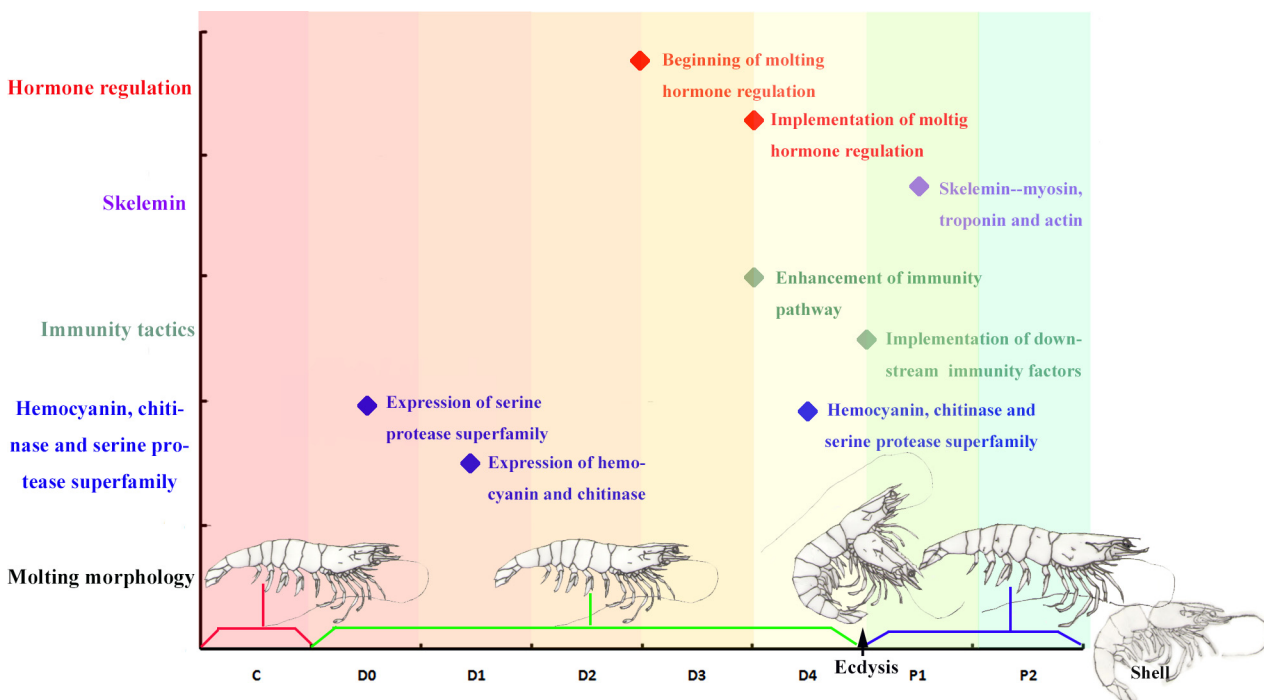

**Fig 8. A cascade of molecular events applicable to the molting cycle of *L. vannamei*.** This figure depicts the molecular events identified in this study in relation to the morphological diversification of molting in a diagrammatic sketch. The rhombi represent molecular events occurring in the molting process. The x-axis represents molting stages.

doi:10.1371/journal.pone.0144350.g008

tactics have not been analyzed so far. We focused on these issues and provided insights into the molecular mechanisms underlying the molting process. This is also the first time that the most important economic species of shrimp, *L. vannamei*, was used to analyze the transcriptome of whole animals during the molting cycle.

We obtained a considerable number of expressed genes; however, we did not investigate the expression of all genes and focused only on the highly expressed ones. Therefore, some infrequently expressed factors that play important roles in molting may be absent. This limitation can be solved by analyzing the transcriptomes of different tissues and developmental stages in shrimp [91–95] or genes with limited expression.

## Conclusion

Here, we report the first comprehensive study utilizing RNA-seq to characterize genes associated with shrimp molting and to deduce the molecular events involved in the molting process. The results provided a basic understanding of the molecular mechanisms undergirding molting, including hormone regulation, skelemin, immune response *etc.* Our results show that molting cycles of *L. vannamei* are encoded by a large number of gene families subject to strict patterns of temporal and spatial regulation. We propose a cascade of molecular events applicable to the molting cycle of *L. vannamei* (Fig 8). These comprehensive analyses provide molecular evidence that will improve our understanding of morphological variation in molting and serve as a potential blueprint for future research on molting in crustaceans and other molting animals.

## Supporting Information

**S1 Fig. The twenty-four clusters including all 5,117 DEGs divided by K\_means\_cluster method.** The x-axis indicates molting stage. The y-axis indicates the  $\log_2(\text{ratio})$  of gene expression. Each grey row represents the relative expression of DEGs in a cluster. The blue line represents the average value of all members in one cluster. The red line indicates reference. Above the red reference line represents up-regulation, and below it represents down-regulation. The total number within a cluster is shown after each subcluster.

(JPG)

**S2 Fig. Gene ontology enrichment of all DEGs in eight comparisons.** The results are summarized in three main GO categories. The x-axis represents the names of these GO subcategories. The left y-axis indicates the percentage of genes. The right y-axis indicates the number of DEGs expressed in a given sub-category.

(JPG)

**S1 Table. Oligonucleotide primers of six genes for the verification experiment.** Gene descriptions, along with product lengths in brackets, are provided.

(DOCX)

**S2 Table. Details of 93,756 unigenes from *L. vannamei* molting cycle.** Each row is a unigene identified from the molting transcriptome. Information provided in the table for each unigene are the expression (FPKM value) in eight stages (C, D0, D1, D2, D3, D4, P1, and P2), unigene length, NCBI non-redundant nucleotide sequence (NR) description, NCBI non-redundant nucleotide sequence (NT) description, KEGG Orthology (KO) description, Swissprot description, PFAM description, GO annotation (biological process, molecular function, and cellular component), and KOG description.

(XLSX)

**S3 Table. Expression profiles of all 5,117 DEGs from the *L. vannamei* molting cycle.** Each row is a DEG identified from the molting transcriptome. Expression levels in all eight stages are provided for each unigene.

(XLSX)

**S4 Table. Details of 259 putative pathways identified for the eight stages of molting.** The name of the pathway, its hierarchy, and the number of members plus their gene IDs are provided.

(XLSX)

**S5 Table. Thirty-six immunity families, including 236 immune genes, categorized between molting stages.** Gene ID, number of members and expression for the eight molting stages are given for each unigene.

(XLSX)

## Acknowledgments

This work was financially supported by the Major State Basic Research Development Program of China (973) (2012CB114403) and the National Natural Science Foundation of China (31172396, 41376165).

## Author Contributions

Conceived and designed the experiments: XZ FL JX. Performed the experiments: YG XZ JW. Analyzed the data: YG XZ. Contributed reagents/materials/analysis tools: JW JY. Wrote the paper: YG XZ JX. Sample collection: XS.

## References

1. Skinner DM (1985) Molting and regeneration. 43–146 p.
2. Aiken D (1980) Molting and growth. The biology and management of lobsters 1: 91–163.
3. Wei J, Zhang X, Yu Y, Huang H, Li F, Xiang J (2014) Comparative Transcriptomic Characterization of the Early Development in Pacific White Shrimp *Litopenaeus vannamei*. PLoS one 9: e106201. doi: [10.1371/journal.pone.0106201](https://doi.org/10.1371/journal.pone.0106201) PMID: [25197823](https://pubmed.ncbi.nlm.nih.gov/25197823/)
4. Diwan A (2005) Current progress in shrimp endocrinology—a review. Indian J Exp Biol 43: 209–223. PMID: [15816407](https://pubmed.ncbi.nlm.nih.gov/15816407/)
5. Corteel M, Dantas-Lima J, Wille M, Alday-Sanz V, Pensaert M, Sorgeloos P, et al. (2012) Moulting cycle of laboratory-raised *Penaeus* (*Litopenaeus*) *vannamei* and *P. monodon*. Aquaculture International 20: 13–18.
6. Kuballa AV, Elizur A (2008) Differential expression profiling of components associated with exoskeletal hardening in crustaceans. BMC genomics 9: 575. doi: [10.1186/1471-2164-9-575](https://doi.org/10.1186/1471-2164-9-575) PMID: [19040762](https://pubmed.ncbi.nlm.nih.gov/19040762/)
7. Liu C-H, Yeh S-T, Cheng S-Y, Chen J-C (2004) The immune response of the white shrimp *Litopenaeus vannamei* and its susceptibility to *Vibrio* infection in relation with the moulting cycle. Fish & shellfish immunology 16: 151–161.
8. Bliss DE, Mantel LH (2012) Integument, Pigments, and Hormonal Processes: Volume 9: Integument, Pigments and Hormonal Processes: Academic Press. 44–128 p.
9. Reynolds SE, Samuels RI (1996) Physiology and biochemistry of insect moulting fluid. Advances in insect physiology 26: 157–232.
10. Zhang P, Zhang X, Li J (2006) Research advances in behavioral ecology of penaeid shrimp II. Effects of environmental factors on behavior of penaeid shrimps. The journal of applied ecology 17: 340–344.
11. Lachaise F, Le Roux A, Hubert M, Lafont R (1993) The molting gland of crustaceans: localization, activity, and endocrine control (a review). J Crust Biol 13: 198–234.
12. Naya Y, Ohnishi M, Ikeda M, Miki W, Nakanishi K (1989) What is molt-inhibiting hormone? The role of an ecdysteroidogenesis inhibitor in the crustacean molting cycle. Proceedings of the National Academy of Sciences 86: 6826–6829.

13. Pamuru RR, Rosen O, Manor R, Chung JS, Zmora N, Glazer L, et al. (2012) Stimulation of molt by RNA interference of the molt-inhibiting hormone in the crayfish *Cherax quadricarinatus*. *General and comparative endocrinology* 178: 227–236. doi: [10.1016/j.ygcen.2012.05.007](https://doi.org/10.1016/j.ygcen.2012.05.007) PMID: [22664421](https://pubmed.ncbi.nlm.nih.gov/22664421/)
14. Hou C, Wang F, Dong S, Zhu Y (2011) The effects of different Ca<sup>2+</sup> concentration fluctuation on the moulting, growth and energy budget of juvenile *Litopenaeus vannamei* (Boone). *Aquaculture Research* 42: 1453–1459.
15. Feng C, Tian X, Dong S, Su Y, Wang F, Ma S (2008) Effects of frequency and amplitude of salinity fluctuation on the growth and energy budget of juvenile *Litopenaeus vannamei* (Boone). *Aquaculture Research* 39: 1639–1646.
16. Guo B, Wang F, Dong S, Gao Q (2011) The effect of rhythmic light color fluctuation on the molting and growth of *Litopenaeus vannamei*. *Aquaculture* 314: 210–214.
17. Priya TJ, Li F, Zhang J, Wang B, Zhao C, Xiang J (2009) Molecular characterization and effect of RNA interference of retinoid X receptor (RXR) on E75 and chitinase gene expression in Chinese shrimp *Fenneropenaeus chinensis*. *Comparative Biochemistry and Physiology Part B: Biochemistry and Molecular Biology* 153: 121–129.
18. Priya TJ, Li F, Zhang J, Yang C, Xiang J (2010) Molecular characterization of an ecdysone inducible gene E75 of Chinese shrimp *Fenneropenaeus chinensis* and elucidation of its role in molting by RNA interference. *Comparative Biochemistry and Physiology Part B: Biochemistry and Molecular Biology* 156: 149–157. doi: [10.1016/j.cbpb.2010.02.004](https://doi.org/10.1016/j.cbpb.2010.02.004) PMID: [20184963](https://pubmed.ncbi.nlm.nih.gov/20184963/)
19. Seear PJ, Tarling GA, Burns G, Goodall-Copestake WP, Gaten E, Özkaya Ö, et al. (2010) Differential gene expression during the moult cycle of Antarctic krill (*Euphausia superba*). *BMC genomics* 11: 582. doi: [10.1186/1471-2164-11-582](https://doi.org/10.1186/1471-2164-11-582) PMID: [20958982](https://pubmed.ncbi.nlm.nih.gov/20958982/)
20. Yudkovski Y, Shechter A, Chalifa-Caspi V, Auslander M, Ophir R, Dauphin-Villemant C, et al. (2007) Hepatopancreatic multi-transcript expression patterns in the crayfish *Cherax quadricarinatus* during the moult cycle. *Insect molecular biology* 16: 661–674. PMID: [18092996](https://pubmed.ncbi.nlm.nih.gov/18092996/)
21. Wang Z, Xiang J, Cui Z (2001) Molecular cloning and sequence analysis of cDNA encoding partial putative molt-inhibiting hormone from the crab *Eriocheir sinensis*. *Oceanologia et Limnologia Sinica* 33: 432–438.
22. Wang Z, Xiang J (2001) Molecular cloning and sequence analysis of cDNAs encoding partial putative molt-inhibiting hormone from the shrimp *Trachypenaeus curvirostris*. *Journal of Fisheries of China* 26: 487–492.
23. Wang Z, Xiang J (2003) Cloning and Analysis of Three Genes Encoding Type CHH Family Neuropeptides from *Fenneropenaeus chinensis*. *Journal of Genetics and Genomics* 30.
24. Yang W-J, Aida K, Terauchi A, Sonobe H, Nagasawa H (1996) Amino acid sequence of a peptide with molt-inhibiting activity from the kuruma prawn *Penaeus japonicus*. *Peptides* 17: 197–202. PMID: [8801521](https://pubmed.ncbi.nlm.nih.gov/8801521/)
25. Ohira T, Watanabe T, Nagasawa H, Aida K (1997) Molecular Cloning of a Molt-Inhibiting Hormone cDNA from the Kuruma Prawn *Penaeus japonicus*. *Zoological science* 14: 785–789. PMID: [9450390](https://pubmed.ncbi.nlm.nih.gov/9450390/)
26. Qian Z, He S, Liu T, Liu Y, Hou F, Liu Q, et al. (2014) Identification of ecdysteroid signaling late-response genes from different tissues of the Pacific white shrimp, *Litopenaeus vannamei*. *Comparative Biochemistry and Physiology Part A: Molecular & Integrative Physiology* 172:10–30.
27. Liao IC, Chien Y-H (2011) The Pacific White Shrimp, *Litopenaeus vannamei*, in Asia: The World's Most Widely Cultured Alien Crustacean. In *The Wrong Place-Alien Marine Crustaceans: Distribution, Biology and Impacts*: Springer. pp. 489–519.
28. Devisetty UK, Covington MF, Tat AV, Lekkala S, Maloof JN (2014) Polymorphism identification and improved genome annotation of *Brassica rapa* through Deep RNA sequencing. *G3-genes, genomics, genetics* 4.
29. Leslie T, Baucom RS (2014) De novo assembly and annotation of the transcriptome of the agricultural weed *Ipomoea purpurea* uncovers gene expression changes associated with herbicide resistance. *G3-genes, genomics, genetics* 4.
30. Zhang YJ, Hao Y, Si F, Ren S, Hu G, Shen L, et al. (2014) The de novo transcriptome and its analysis in the worldwide vegetable pest, *Delia antiqua* (Diptera: Anthomyiidae). *G3-genes, genomics, genetics* 4: 851–859.
31. Li B, Dewey CN (2011) RSEM: accurate transcript quantification from RNA-Seq data with or without a reference genome. *BMC bioinformatics* 12: 323. doi: [10.1186/1471-2105-12-323](https://doi.org/10.1186/1471-2105-12-323) PMID: [21816040](https://pubmed.ncbi.nlm.nih.gov/21816040/)
32. Mortazavi A, Williams BA, McCue K, Schaeffer L, Wold B (2008) Mapping and quantifying mammalian transcriptomes by RNA-Seq. *Nature methods* 5: 621–628. doi: [10.1038/nmeth.1226](https://doi.org/10.1038/nmeth.1226) PMID: [18516045](https://pubmed.ncbi.nlm.nih.gov/18516045/)

33. Wang L, Feng Z, Wang X, Wang X, Zhang X (2010) DEGseq: an R package for identifying differentially expressed genes from RNA-seq data. *Bioinformatics* 26: 136–138. doi: [10.1093/bioinformatics/btp612](https://doi.org/10.1093/bioinformatics/btp612) PMID: [19855105](https://pubmed.ncbi.nlm.nih.gov/19855105/)
34. Conesa A, Götz S, García-Gómez JM, Terol J, Talón M, Robles M (2005) Blast2GO: a universal tool for annotation, visualization and analysis in functional genomics research. *Bioinformatics* 21: 3674–3676. PMID: [16081474](https://pubmed.ncbi.nlm.nih.gov/16081474/)
35. Ye J, Fang L, Zheng H, Zhang Y, Chen J, Zhang Z, et al. (2006) WEGO: a web tool for plotting GO annotations. *Nucleic acids research* 34: W293–W297. PMID: [16845012](https://pubmed.ncbi.nlm.nih.gov/16845012/)
36. Kanehisa M, Goto S (2000) KEGG: Kyoto Encyclopedia of Genes and Genomes. *Nucleic Acids Research* 28: 27–30. PMID: [10592173](https://pubmed.ncbi.nlm.nih.gov/10592173/)
37. de Hoon MJ, Imoto S, Nolan J, Miyano S (2004) Open source clustering software. *Bioinformatics* 20: 1453–1454. PMID: [14871861](https://pubmed.ncbi.nlm.nih.gov/14871861/)
38. Saldanha AJ (2004) Java Treeview—extensible visualization of microarray data. *Bioinformatics* 20: 3246–3248. PMID: [15180930](https://pubmed.ncbi.nlm.nih.gov/15180930/)
39. Livak KJ, Schmittgen TD (2001) Analysis of relative gene expression data using real-time quantitative PCR and the 2<sup>-</sup> $\Delta\Delta$ CT method. *methods* 25: 402–408. PMID: [11846609](https://pubmed.ncbi.nlm.nih.gov/11846609/)
40. Margam VM, Gelman DB, Palli SR (2006) Ecdysteroid titers and developmental expression of ecdysteroid-regulated genes during metamorphosis of the yellow fever mosquito, *Aedes aegypti* (Diptera: Culicidae). *Journal of Insect Physiology* 52: 558–568. PMID: [16580015](https://pubmed.ncbi.nlm.nih.gov/16580015/)
41. Ote M, Mita K, Kawasaki H, Daimon T, Kobayashi M, Shimada T (2005) Identification of molting fluid carboxypeptidase A (MF-CPA) in *Bombyx mori*. *Comparative Biochemistry & Physiology Part B Biochemistry & Molecular Biology* 141: 314–322.
42. Durica DS, Wu X, Anilkumar G, Hopkins PM, Chung AC-K (2002) Characterization of crab EcR and RXR homologs and expression during limb regeneration and oocyte maturation. *Molecular and cellular endocrinology* 189: 59–76. PMID: [12039065](https://pubmed.ncbi.nlm.nih.gov/12039065/)
43. Thummel CS, Jones CW, Karim FD, Hogness DS (1990) The *Drosophila* 74EF early puff contains E74, a complex ecdysone-inducible gene that encodes two ets-related proteins. *Cell* 61: 85–99. PMID: [2107982](https://pubmed.ncbi.nlm.nih.gov/2107982/)
44. Wu W, Tak EY, Loverde PT (2008) *Schistosoma mansoni*: SmE78, a nuclear receptor orthologue of *Drosophila* ecdysone-induced protein 78. *Experimental Parasitology* 119: 313–318. doi: [10.1016/j.exppara.2008.03.001](https://doi.org/10.1016/j.exppara.2008.03.001) PMID: [18430421](https://pubmed.ncbi.nlm.nih.gov/18430421/)
45. Durica DS, Das S, Najjar F, Roe B, Phillips B, Kappalli S, et al. (2014) Alternative splicing in the fiddler crab cognate ecdysteroid receptor: Variation in receptor isoform expression and DNA binding properties in response to hormone. *General and Comparative Endocrinology* 206: 80–95. doi: [10.1016/j.ygcen.2014.05.034](https://doi.org/10.1016/j.ygcen.2014.05.034) PMID: [25025945](https://pubmed.ncbi.nlm.nih.gov/25025945/)
46. Borst DW, Laufer H, Landau M, Chang ES, Hertz WA, Baker F, et al. (1987) Methyl farnesoate and its role in crustacean reproduction and development. *Insect Biochemistry* 17: 1123–1127.
47. Ganji PCN (2007) Is methyl farnesoate a crustacean hormone? *Aquaculture* 1: 39–54.
48. Li Z, Xu X, Wang J, Wang C (2013) Possible Roles of Farnesoic Acid O-Methyltransferase in Regulation of Molting in the Shrimp, *Penaeus Chinensis*. *Journal of the World Aquaculture Society* 44: 826–834.
49. Shechter A, Aflalo ED, Davis C, Sagi A (2005) Expression of the reproductive female-specific vitellogenin gene in endocrinologically induced male and intersex *Cherax quadricarinatus* crayfish. *Biology of Reproduction* 73: 72–79. PMID: [15744019](https://pubmed.ncbi.nlm.nih.gov/15744019/)
50. Mindnich R, Möller G, Adamski J (2004) The role of 17 beta-hydroxysteroid dehydrogenases. *Molecular & Cellular Endocrinology* 218: 7–20.
51. Christie AE (2014) Identification of the first neuropeptides from the Amphipoda (Arthropoda, Crustacea). *General & Comparative Endocrinology* 206: 96–110.
52. Sathapondecha P, Panyim S, Udomkit A (2014) Molecular characterization of a cDNA encoding red pigment-concentrating hormone in black tiger shrimp *Penaeus monodon*: Implication of its function in molt and osmoregulation. *Comparative Biochemistry & Physiology Part A Molecular & Integrative Physiology* 175: 124–130.
53. Li F, Xiang J (2013) Signaling pathways regulating innate immune responses in shrimp. *Fish & shellfish immunology* 34: 973–980.
54. Li F, Xiang J (2013) Recent advances in researches on the innate immunity of shrimp in China. *Developmental & Comparative Immunology* 39: 11–26.



55. Chung JS, Webster SG (2003) Molt cycle-related changes in biological activity of moult-inhibiting hormone (MIH) and crustacean hyperglycaemic hormone (CHH) in the crab, *Carcinus maenas*. *European Journal of Biochemistry* 270: 3280–3288. PMID: [12869204](#)
56. Naylor E (1957) *The Biology of Crustacea*.
57. Chang ES (1993) Comparative endocrinology of molting and reproduction: insects and crustaceans. *Annual review of entomology* 38: 161–180. PMID: [8424625](#)
58. Nakatsuji T, Keino H, Tamura K, Yoshimura S, Kawakami T, Aimoto S, et al. (2000) Changes in the amounts of the molt-inhibiting hormone in sinus glands during the molt cycle of the American crayfish, *Procambarus clarkii*. *Zoological science* 17: 1129–1136. doi: [10.2108/zsj.17.1129](#) PMID: [18522469](#)
59. Lee KJ, Watson RD, Roer RD (1998) Molt-inhibiting hormone mRNA levels and ecdysteroid titer during a molt cycle of the blue crab, *Callinectes sapidus*. *Biochemical and biophysical research communications* 249: 624–627. PMID: [9731186](#)
60. Relaix F, Zammit PS (2012) Satellite cells are essential for skeletal muscle regeneration: the cell on the edge returns centre stage. *Development* 139: 2845–2856. doi: [10.1242/dev.069088](#) PMID: [22833472](#)
61. Hooper SL, Thuma JB (2005) Invertebrate muscles: muscle specific genes and proteins. *Physiological Reviews* 85: 1001–1060. PMID: [15987801](#)
62. Schafer DA, Gill SR, Cooper JA, Heuser JE, Schroer TA (1994) Ultrastructural analysis of the dynactin complex: an actin-related protein is a component of a filament that resembles F-actin. *Journal of Cell Biology* 126: 403–412. PMID: [7518465](#)
63. Uddowla MH, Salma U, Kim H-W (2013) Molecular characterization of four actin cDNAs and effects of 20-hydroxyecdysone on their expression in swimming crab, *Portunus trituberculatus* (Miers, 1876). *Animal Cells & Systems* 17: 203–212.
64. Goeckeler ZM, Wysolmerski RB (1995) Myosin light chain kinase-regulated endothelial cell contraction: the relationship between isometric tension, actin polymerization, and myosin phosphorylation. *Journal of Cell Biology* 130: 613–627. PMID: [7622562](#)
65. Hudson NJ, Franklin CE (2002) Maintaining muscle mass during extended disuse: aestivating frogs as a model species. *Journal of Experimental Biology* 205: 2297–2303. PMID: [12110663](#)
66. Koenders A, Yu X, Chang ES, Mykles DL (2002) Ubiquitin and actin expression in claw muscles of land crab, *Gecarcinus lateralis*, and american lobster, *Homarus americanus*: Differential expression of ubiquitin in two slow muscle fiber types during molt-induced atrophy. *Journal of Experimental Zoology* 292: 618–632. PMID: [12115927](#)
67. Lehman W, Hatch V, Korman V, Rosol M, Thomas L, Maytum R, et al. (2000). Tropomyosin and actin isoforms modulate the localization of tropomyosin strands on actin filaments. *Journal of Molecular Biology*, 302(3), 593–606. PMID: [10986121](#)
68. Kiran RBP, Rajendran KV, Jung SJ, Oh MJ (2002) Experimental susceptibility of different life-stages of the giant freshwater prawn, *Macrobrachium rosenbergii* (de Man), to white spot syndrome virus (WSSV). *Journal of Fish Diseases* 25: 201–207.
69. Ning L, Lan JF, Sun JJ, Jia WM, Zhao XF, Wang JX (2014) A novel crustin from *Marsupenaeus japonicus* promotes hemocyte phagocytosis. *Developmental & Comparative Immunology* 49: 313–322.
70. Brown KL, Hancock RE (2006) Cationic host defense (antimicrobial) peptides. *Current Opinion in Immunology* 18: 24–30. PMID: [16337365](#)
71. Hancock REW, Brown KL, Neeloffer M (2006) Host defence peptides from invertebrates—emerging antimicrobial strategies. *Immunobiology* 211: 315–322. PMID: [16697922](#)
72. Li S, Guo S, Li F, Xiang J (2014) Characterization and function analysis of an anti-lipoplysaccharide factor (ALF) from the Chinese shrimp *Fenneropenaeus chinensis*. *Developmental & Comparative Immunology* 46: 349–355.
73. Jiang HS, Zhang Q, Zhao YR, Jia WM, Zhao XF, Wang JX (2014) A new group of anti-lipoplysaccharide factors from *Marsupenaeus japonicus* functions in antibacterial response. *Developmental & Comparative Immunology* 48: 33–42.
74. Li S, Guo S, Li F, Xiang J (2014) Characterization and function analysis of an anti-lipoplysaccharide factor (ALF) from the Chinese shrimp *Fenneropenaeus chinensis*. *Developmental & Comparative Immunology* 46: 349–355.
75. Zhang Y, Wang L, Wang L, Yang J, Gai Y, Qiu L, et al. (2010) The second anti-lipoplysaccharide factor (EsALF-2) with antimicrobial activity from *Eriocheir sinensis*. *Developmental & Comparative Immunology* 34: 945–952.
76. Liu Y, Cui Z, Li X, Song C, Shi G (2013) A newly identified anti-lipoplysaccharide factor from the swimming crab *Portunus trituberculatus* with broad spectrum antimicrobial activity. *Fish & Shellfish Immunology* 34: 463–470.

77. Kuballa AV, Holton TA, Paterson B, Elizur A (2011) Moulting cycle specific differential gene expression profiling of the crab *Portunus pelagicus*. *BMC genomics* 12: 147. doi: [10.1186/1471-2164-12-147](https://doi.org/10.1186/1471-2164-12-147) PMID: [21396120](https://pubmed.ncbi.nlm.nih.gov/21396120/)
78. Cheng WT, Liu CH, Yan DF, Chen JC (2002) Hemolymph oxyhemocyanin, protein, osmolality and electrolyte levels of whiteleg shrimp *Litopenaeus vannamei* in relation to size and molt stage. *Aquaculture* 211: 325–339.
79. Merzendorfer H, Zimoch L (2003) Chitin metabolism in insects: structure, function and regulation of chitin synthases and chitinases. *Journal of Experimental Biology* 206: 4393–4412. PMID: [14610026](https://pubmed.ncbi.nlm.nih.gov/14610026/)
80. Harris JL, Backes BJ, Leonetti F, Mahrus S, Ellman JA, Craik C (2000) Rapid and general profiling of protease specificity by using combinatorial fluorogenic substrate libraries. *Proceedings of the National Academy of Sciences of the United States of America* 97: 7754–7759. PMID: [10869434](https://pubmed.ncbi.nlm.nih.gov/10869434/)
81. Ceccaldi HJ (1990) Anatomy and physiology of digestive tract of crustaceans decapods reared in aquaculture. *IFREMER Actes de Colloques*: 243–259.
82. Muhlia-Almazan A, Garcia-Carreno FL (2003) Digestion physiology and proteolytic enzymes of crustacean species of the Mexican Pacific Ocean; Hendrickx ME, editor: Instituto de Ciencias del Mar y Limnología, UNAM. 77–91 p.
83. Klein B, LeMoullac G, Sello D, VanWormhoudt A (1996) Molecular cloning and sequencing of trypsin cDNAs from *Penaeus vannamei* (Crustacea, Decapoda): Use in assessing gene expression during the moulting cycle. *International Journal of Biochemistry & Cell Biology* 28: 551–563.
84. Fischbarg J, Kuang K, Li J, Iserovich P, Wen Q (1997) Aquaporins and ion conductance. *Science* 275:1491
85. Shen W, Ren G, Zhu Y, Zhang X (2015) Characterization of MSTN/GDF11 gene from shrimp *Macrobrachium nipponense* and its expression profiles during molt cycle and after eyestalk ablation. *Genes & Genomics* 37: 441–449.
86. Pakkakul S, Kornsune P, Benjamart P, Thanawat S, Piti A, Boonsirm W, et al. (2014) Knockdown of a novel G-protein pathway suppressor 2 (GPS2) leads to shrimp mortality by exuvial entrapment during ecdysis. *Fish & Shellfish Immunology* 37: 46–52.
87. Kuballa AV, Elizur A (2008) Differential expression profiling of components associated with exoskeletal hardening in crustaceans. *Bmc Genomics* 9: 2199–2203.
88. Liang J, Zhang L, Xiang Z, He N (2010) Expression profile of cuticular genes of silkworm, *Bombyx mori*. *Bmc Genomics* 11: 1702–1716.
89. Soares MPM, Barchuk AR, Simoes ACQ, Cristino AdS, Freitas FCdP, Luísa LC, et al. (2013) Genes involved in thoracic exoskeleton formation during the pupal-to-adult molt in a social insect model, *Apis mellifera*. *Bmc Genomics* 14: 489–490.
90. Abehsera S, Glazer L, Tynyakov J, Plaschkes I, Chalifa-Caspi V, Khalaila I, et al. (2015) Binary Gene Expression Patterning of the Molt Cycle: The Case of Chitin Metabolism. *Plos One* 10.
91. Chen K, Li E, Li T, Xu C, Wang X, Lin H, et al. (2015) Transcriptome and Molecular Pathway Analysis of the Hepatopancreas in the Pacific White Shrimp *Litopenaeus vannamei* under Chronic Low-Salinity Stress. *Plos One* 10 (7):e0131503. doi: [10.1371/journal.pone.0131503](https://doi.org/10.1371/journal.pone.0131503) PMID: [26147449](https://pubmed.ncbi.nlm.nih.gov/26147449/)
92. Powell D, Knibb W, Remilton C, Elizur A (2015) De-novo transcriptome analysis of the banana shrimp (*Fenneropenaeus merguensis*) and identification of genes associated with reproduction and development. *Marine Genomics* 22: 71–78. doi: [10.1016/j.margen.2015.04.006](https://doi.org/10.1016/j.margen.2015.04.006) PMID: [25936497](https://pubmed.ncbi.nlm.nih.gov/25936497/)
93. Ghaffari N, Sanchez-Flores A, Doan R, Garcia-Orozco KD, Chen PL, Ochoa-Leyva A, et al. (2014) Novel transcriptome assembly and improved annotation of the whiteleg shrimp (*Litopenaeus vannamei*), a dominant crustacean in global seafood mariculture. *Scientific Reports* 4: 7081–7081. doi: [10.1038/srep07081](https://doi.org/10.1038/srep07081) PMID: [25420880](https://pubmed.ncbi.nlm.nih.gov/25420880/)
94. Santos CA (2014) RNA-seq as a powerful tool for penaeid shrimp genetic progress. *Frontiers in Genetics* 5: 298–298. doi: [10.3389/fgene.2014.00298](https://doi.org/10.3389/fgene.2014.00298) PMID: [25221571](https://pubmed.ncbi.nlm.nih.gov/25221571/)
95. Maizatul Izzah MS, Yi K, Zhao L, Tian Tian T, Bin KQ, Hang L, et al. (2013) In-depth transcriptomic analysis on giant freshwater prawns. *Plos One* 8: e60839–e60839. doi: [10.1371/journal.pone.0060839](https://doi.org/10.1371/journal.pone.0060839) PMID: [23734171](https://pubmed.ncbi.nlm.nih.gov/23734171/)
